# Supplementary material for: Glycosaminoglycans as Biomarkers for Mucopolysaccharidoses and Other Disorders
Source: MDPI journal article supplement (doi:10.3390/diagnostics11091563), 2021-08-28
Supplement: s1 [file s1]

### Supplementary Materials:

**Table S1:** Patients with disease or condition and corresponding glycosaminoglycan levels (ng/mL).

| Sex     | Age  | Diagnosis                                               | Severity | Disease Stage      | DiHS-0S | DiHS-NS | Di4S  | Di-sulfated KS | Mono-sulfated KS | DiKS/ Total KS |
|---------|------|---------------------------------------------------------|----------|--------------------|---------|---------|-------|----------------|------------------|----------------|
| M       | 0.33 | rhabdomyolysis, UTI                                     | mild     | initial            | 21.5    | 6.4     | 110.5 | 22.2           | 421.1            | 5.0            |
| M       | 0.33 | rhabdomyolysis, UTI                                     | mild     | recovery           | 16.6    | 8.2     | 96.9  | 108.4          | 420.3            | 20.5           |
| M       | 0.0  | hypertrophic cardiomyopathy                             | moderate | screening (stable) | 25.7    | 21.6    | 152.3 | 59.2           | 549.5            | 9.7            |
| M       | 0    | left megalocephaly                                      | severe   | initial            | 12.4    | 14.5    | 49.4  | 61.6           | 384.9            | 13.8           |
| M       | 0.0  | developmental disorder                                  | unknown  | unknown            | 36.5    | 18.2    | 104.0 | 147.7          | 912.1            | 13.9           |
| unknown | 0.04 | GAI suspect                                             | mild     | screening (stable) | 56.1    | 16.7    | 113.8 | 260.6          | 1095.1           | 19.2           |
| M       | 0.04 | jaundice, metabolic acidosis                            | mild     | peak               | 42.4    | 14.8    | 151.8 | 89.2           | 550.7            | 13.9           |
| M       | 0.07 | ALTE, hypothermia, hypoglycemia                         | moderate | recovery           | 81.7    | 22.6    | 138.7 | 330.8          | 1254.2           | 20.9           |
| M       | 0.07 | hypoglycemic encephalopathy                             | severe   | screening (stable) | 26.9    | 17.9    | 122.0 | 281.2          | 1015.0           | 21.7           |
| F       | 0.08 | acute myocarditis                                       | severe   | initial            | 30.3    | 0.8     | 46.8  | 80.4           | 513.2            | 13.5           |
| M       | 0.08 | early myoclonic encephalopathy?                         | severe   | peak               | 16.8    | 2.0     | 23.6  | 117.0          | 252.8            | 31.6           |
| M       | 0.08 | early myoclonic encephalopathy?                         | severe   | peak               | 27.3    | 1.7     | 121.2 | 97.7           | 838.4            | 10.4           |
| F       | 0.08 | epilepsy, seizure                                       | unknown  | screening (stable) | 25.2    | 25.3    | 101.8 | 162.8          | 955.7            | 14.6           |
| F       | 0.17 | acute encephalopathy                                    | severe   | initial            | 65.1    | 131.0   | 542.6 | 232.7          | 699.4            | 25.0           |
| F       | 0.2  | encephalopathy, RSV +, hepatitis                        | severe   | initial            | 38.1    | 37.5    | 236.1 | 458.6          | 1458.3           | 23.9           |
| F       | 0.17 | secondary carnitine deficiency                          | mild     | screening (stable) | 31.3    | 19.7    | 114.5 | 326.1          | 1002.1           | 24.6           |
| F       | 0.25 | afebrile seizure, epilepsy?                             | moderate | screening (stable) | 30.9    | 24.0    | 120.3 | 153.7          | 918.1            | 14.3           |
| F       | 0.25 | epilepsy                                                | moderate | peak               | 4.6     | 7.1     | 45.3  | 129.1          | 637.3            | 16.8           |
| F       | 0.25 | coarctation of the aorta, lactic acidemia, CK elevation | moderate | screening (stable) | 25.2    | 10.8    | 68.2  | 92.5           | 584.6            | 13.7           |
| F       | 0.3  | influenza encephalopathy                                | unknown  | unknown            | 112.9   | 353.1   | 928.5 | 630.1          | 1193.0           | 34.6           |
| F       | 0.3  | influenza encephalopathy                                | unknown  | unknown            | 68.5    | 158.0   | 444.9 | 483.6          | 945.8            | 33.8           |

|         |      |                                                                                        |          |                    |      |       |       |       |        |      |
|---------|------|----------------------------------------------------------------------------------------|----------|--------------------|------|-------|-------|-------|--------|------|
| F       | 0.25 | encephalopathy                                                                         | severe   | initial            | 44.5 | 62.2  | 296.6 | 240.9 | 818.9  | 22.7 |
| M       | 0.25 | acute encephalopathy, DIC                                                              | moderate | initial            | 60.8 | 210.1 | 495.2 | 336.8 | 554.3  | 37.8 |
| M       | 0.33 | acute encephalopathy                                                                   | severe   | initial            | 28.3 | 53.8  | 237.6 | 330.2 | 967.2  | 25.5 |
| M       | 0.33 | encephalopathy?, lactic acidemia                                                       | severe   | unknown            | 19.0 | 17.4  | 96.6  | 94.4  | 524.2  | 15.3 |
| F       | 0.3  | CPT2 deficiency                                                                        | moderate | peak               | 31.3 | 20.5  | 163.3 | 194.1 | 1109.8 | 14.9 |
| F       | 0.33 | West syndrome                                                                          | moderate | screening (stable) | 24.2 | 20.1  | 66.1  | 78.8  | 570.5  | 12.1 |
| F       | 0.33 | shock, encephalopathy,<br>Reye syndrome?, CPT2 deficiency                              | severe   | peak               | 30.0 | 59.8  | 267.0 | 187.9 | 519.4  | 26.6 |
| F       | 0.42 | hyperbilirubinemia, transient<br>tachypnea                                             | moderate | screening (stable) | 32.3 | 16.2  | 130.8 | 140.9 | 674.3  | 17.3 |
| F       | 0.42 | West syndrome                                                                          | moderate | screening (stable) | 35.2 | 16.2  | 137.6 | 312.8 | 1165.2 | 21.2 |
| unknown | 0.42 | seizure                                                                                | moderate | screening (stable) | 13.4 | 18.2  | 121.7 | 117.5 | 762.0  | 13.4 |
| F       | 0.42 | partial convulsion                                                                     | moderate | screening (stable) | 16.5 | 51.1  | 56.4  | 98.6  | 488.2  | 16.8 |
| F       | 0.42 | muscle weakness, low-oxygen<br>ischemic injury?                                        | mild     | screening (stable) | 15.4 | 24.8  | 127.2 | 81.1  | 662.9  | 10.9 |
| M       | 0.42 | SIDS?, metabolic acidosis                                                              | moderate | initial            | 20.7 | 37.6  | 42.4  | 126.0 | 725.2  | 14.8 |
| M       | 0.4  | GAI suspect                                                                            | unknown  | screening (stable) | 26.5 | 12.4  | 96.6  | 314.1 | 741.9  | 29.7 |
| unknown | 0.42 | GAI                                                                                    | unknown  | screening (stable) | 21.7 | 12.4  | 114.4 | 85.8  | 789.3  | 9.8  |
| M       | 0.42 | metabolic acidosis                                                                     | mild     | screening (stable) | 26.5 | 5.7   | 44.0  | 87.3  | 544.0  | 13.8 |
| M       | 0.42 | hypoxic ischemic encephalopathy                                                        | severe   | peak               | 1.6  | 0.8   | 57.8  | 15.1  | 266.4  | 5.3  |
| M       | 0.42 | acute encephalopathy                                                                   | severe   | initial            | 30.6 | 33.4  | 188.7 | 216.3 | 769.4  | 21.9 |
| F       | 0.42 | acute encephalopathy with biphasic<br>seizures and late reduced diffusion<br>(suspect) | moderate | initial            | 30.3 | 19.8  | 148.8 | 338.8 | 909.6  | 27.1 |
| M       | 0.42 | acute encephalopathy suspect                                                           | moderate | initial            | 20.7 | 9.8   | 134.6 | 148.7 | 687.4  | 17.8 |
| M       | 0.5  | vomiting                                                                               | mild     | screening (stable) | 23.4 | 11.8  | 81.8  | 199.3 | 550.5  | 26.6 |
| M       | 0.5  | TAM, elevation of AST, ALT                                                             | mild     | screening (stable) | 16.7 | 13.7  | 100.4 | 77.9  | 488.4  | 13.8 |
| M       | 0.5  | epilepsy, seizure                                                                      | mild     | screening (stable) | 19.3 | 24.1  | 137.0 | 171.8 | 846.1  | 16.9 |

|   |      |                                                                |          |                    |      |       |            |       |       |      |
|---|------|----------------------------------------------------------------|----------|--------------------|------|-------|------------|-------|-------|------|
| F | 0.5  | acute encephalopathy                                           | severe   | peak               | 61.2 | 393.1 | 1128.<br>9 | 235.7 | 592.0 | 28.5 |
| M | 0.5  | hemorrhagic shock and encephalopathy syndrome                  | severe   | initial            | 9.5  | 20.9  | 117.3      | 107.6 | 454.8 | 19.1 |
| F | 0.58 | developmental delay, renal failure                             | mild     | screening (stable) | 19.7 | 7.9   | 62.6       | 172.6 | 476.4 | 26.6 |
| M | 0.58 | acute encephalopathy                                           | moderate | screening (stable) | 17.5 | 11.0  | 99.8       | 242.4 | 750.9 | 24.4 |
| F | 0.58 | acute encephalopathy                                           | moderate | recovery           | 30.2 | 13.9  | 131.0      | 152.7 | 603.9 | 20.2 |
| F | 0.58 | acute encephalopathy                                           | severe   | peak               | 58.9 | 97.0  | 418.3      | 239.3 | 874.6 | 21.5 |
| F | 0.58 | floppy infant                                                  | mild     | screening (stable) | 11.6 | 17.2  | 88.5       | 110.7 | 675.8 | 14.1 |
| F | 0.67 | muscle weakness                                                | mild     | screening (stable) | 24.7 | 16.3  | 101.2      | 98.3  | 782.6 | 11.2 |
| M | 0.67 | hyper-CK-emia, pneumonia, developmental delay, hypotonic       | mild     | screening (stable) | 11.6 | 12.5  | 80.7       | 108.7 | 461.2 | 19.1 |
| M | 0.67 | Acute encephalopathy                                           | severe   | initial            | 70.5 | 253.2 | 782.8      | 175.1 | 557.9 | 23.9 |
| M | 0.7  | post ALTE, cardiac arrest, brain edema, on hypothermia therapy | severe   | peak               | 27.2 | 25.2  | 107.4      | 82.0  | 553.1 | 12.9 |
| F | 0.75 | rotavirus gastroenteritis, generalized seizure                 | unknown  | unknown            | 27.8 | 20.7  | 123.9      | 192.9 | 841.1 | 18.7 |
| M | 0.8  | AGE, dehydration, liver dysfunction                            | moderate | peak               | 19.4 | 7.3   | 71.6       | 144.7 | 508.8 | 22.1 |
| M | 0.75 | jaundice                                                       | mild     | screening (stable) | 19.4 | 10.8  | 73.6       | 259.7 | 941.5 | 21.6 |
| F | 0.75 | development disorders, hypoglycemia                            | mild     | screening (stable) | 27.4 | 13.1  | 82.4       | 144.8 | 452.8 | 24.2 |
| M | 0.8  | MR                                                             | mild     | screening (stable) | 21.5 | 10.7  | 79.4       | 111.1 | 607.8 | 15.5 |
| F | 0.75 | acute encephalopathy                                           | moderate | initial            | 42.5 | 46.8  | 243.5      | 344.2 | 867.8 | 28.4 |
| F | 0.75 | Leigh encephalopathy suspect                                   | moderate | peak               | 12.5 | 10.1  | 50.7       | 94.7  | 483.6 | 16.4 |
| M | 0.75 | mitochondrial disease suspect, Leigh encephalopathy            | severe   | peak               | 23.6 | 19.2  | 123.6      | 111.1 | 572.7 | 16.2 |

|   |      |                                                             |          |                    |      |      |       |       |        |      |
|---|------|-------------------------------------------------------------|----------|--------------------|------|------|-------|-------|--------|------|
| F | 0.8  | norovirus encephalopathy, artificial respiration +          | severe   | peak               | 61.4 | 54.5 | 249.3 | 305.3 | 630.8  | 32.6 |
| F | 0.83 | developmental disorder                                      | mild     | screening (stable) | 35.7 | 44.9 | 49.5  | 93.9  | 607.1  | 13.4 |
| F | 0.83 | developmental disorder                                      | mild     | screening (stable) | 21.0 | 11.8 | 75.5  | 124.3 | 942.1  | 11.7 |
| M | 0.83 | methylmalonic acidemia                                      | moderate | screening (stable) | 22.9 | 11.9 | 86.0  | 63.1  | 396.7  | 13.7 |
| M | 0.83 | High CKemia                                                 | unknown  | screening (stable) | 17.0 | 8.1  | 62.0  | 138.2 | 769.6  | 15.2 |
| M | 0.8  | fatty acid metabolism disorder suspect                      | unknown  | screening (stable) | 18.5 | 9.0  | 63.8  | 118.5 | 931.4  | 11.3 |
| M | 0.92 | epilepsy                                                    | mild     | screening (stable) | 12.1 | 8.4  | 65.3  | 88.4  | 551.6  | 13.8 |
| M | 0.92 | developmental delay, hypopituitary gland                    | mild     | screening (stable) | 6.8  | 6.5  | 49.3  | 73.4  | 324.0  | 18.5 |
| M | 0.92 | West syndrome                                               | moderate | screening (stable) | 46.7 | 20.1 | 173.2 | 363.5 | 818.0  | 30.8 |
| M | 1    | myopathy, rhabdomyolysis?                                   | mild     | screening (stable) | 21.6 | 9.4  | 72.7  | 133.3 | 892.4  | 13.0 |
| F | 1.0  | secondary carnitine deficiency, CFPN-PI induced             | moderate | peak               | 23.3 | 16.6 | 102.2 | 189.7 | 1190.9 | 13.7 |
| F | 1.0  | MCAD                                                        | moderate | initial            | 6.0  | 9.7  | 58.1  | 54.7  | 319.1  | 14.6 |
| M | 1.0  | fatty acid metabolism disorder suspect                      | mild     | screening (stable) | 22.9 | 4.8  | 72.1  | 132.8 | 786.2  | 14.4 |
| M | 1.0  | CPT2 deficiency                                             | moderate | screening (stable) | 12.2 | 7.4  | 57.4  | 198.6 | 515.9  | 27.8 |
| M | 1    | secondary carnitine deficiency, mental deficiency, epilepsy | mild     | screening (stable) | 20.6 | 14.0 | 79.7  | 134.0 | 878.5  | 13.2 |
| F | 1.00 | inguinal hernia, liver disorder                             | mild     | screening (stable) | 22.7 | 4.7  | 23.6  | 102.8 | 634.5  | 13.9 |
| F | 1    | hypoglycemia, congenital biliary atresia                    | moderate | recovery           | 23.3 | 21.6 | 66.0  | 100.9 | 617.5  | 14.0 |
| M | 1    | a bilious attack, disturbance of consciousness, fatty liver | moderate | recovery           | 9.1  | 24.2 | 89.9  | 183.1 | 1229.5 | 13.0 |
| F | 1    | afebrile seizure, epilepsy?                                 | mild     | screening (stable) | 14.1 | 2.9  | 75.4  | 138.4 | 871.1  | 13.7 |

|         |      |                                                              |          |                    |      |        |         |       |        |      |
|---------|------|--------------------------------------------------------------|----------|--------------------|------|--------|---------|-------|--------|------|
| F       | 1    | afebrile convulsion, hypoglycemia                            | moderate | screening (stable) | 27.9 | 22.6   | 93.9    | 94.0  | 605.9  | 13.4 |
| M       | 1.0  | tonic-clonic seizure                                         | mild     | screening (stable) | 16.3 | 8.8    | 68.0    | 100.7 | 576.9  | 14.9 |
| M       | 1    | ketotic hypoglycemia                                         | moderate | recovery           | 33.4 | 11.2   | 99.9    | 139.0 | 840.2  | 14.2 |
| M       | 1.00 | ketotic hypoglycemia                                         | moderate | initial            | 16.3 | 9.7    | 84.5    | 199.7 | 558.9  | 26.3 |
| M       | 1.00 | low glucose                                                  | mild     | screening (stable) | 20.5 | 6.1    | 28.4    | 68.7  | 407.7  | 14.4 |
| F       | 1    | hyper-CK-emia, muscular dystrophy?                           | mild     | screening (stable) | 13.1 | 9.9    | 60.6    | 157.7 | 717.1  | 18.0 |
| unknown | 1    | metabolic myopathy suspect                                   | mild     | screening (stable) | 22.8 | 11.3   | 84.3    | 83.8  | 632.0  | 11.7 |
| F       | 1.0  | mental and development disorder                              | mild     | screening (stable) | 22.5 | 12.7   | 61.2    | 125.5 | 830.3  | 13.1 |
| F       | 1.0  | developmental disorder, mitochondria disorder?               | mild     | screening (stable) | 19.8 | 13.3   | 80.2    | 120.5 | 798.1  | 13.1 |
| M       | 1.0  | developmental delay                                          | mild     | screening (stable) | 25.3 | 30.0   | 188.7   | 121.8 | 1071.7 | 10.2 |
| M       | 1.0  | developmental disorder, hyperlactatemia                      | mild     | screening (stable) | 23.0 | 10.6   | 62.7    | 165.7 | 1095.1 | 13.1 |
| M       | 1.00 | developmental disorders                                      | mild     | screening (stable) | 8.9  | 4.6    | 31.4    | 84.9  | 967.9  | 8.1  |
| F       | 1    | development disorder, febrile delirium, metabolic disorders? | mild     | screening (stable) | 24.0 | 1.0    | 84.5    | 129.8 | 723.3  | 15.2 |
| F       | 1    | hyper-CK-emia                                                | mild     | screening (stable) | 21.3 | 1.6    | 43.9    | 112.4 | 597.0  | 15.8 |
| M       | 1    | rotavirus encephalopathy, encephalitis, myocarditis          | severe   | screening (stable) | 5.4  | 5.3    | 58.9    | 208.7 | 749.8  | 21.8 |
| M       | 1.0  | MR, microcephaly, hyperlactatemia                            | mild     | screening (stable) | 20.4 | 9.2    | 66.6    | 115.4 | 828.3  | 12.2 |
| unknown | 1.0  | head circumference enlargement, MR                           | mild     | screening (stable) | 22.0 | 3.3    | 64.2    | 334.4 | 988.8  | 25.3 |
| M       | 1.00 | metabolic acidosis                                           | moderate | initial            | 15.1 | 5.6    | 40.8    | 48.7  | 334.2  | 12.7 |
| M       | 1    | SIDS-like, influ A+, acidosis, hyperlactatemia               | severe   | initial            | 46.2 | 2828.8 | 12475.3 | 285.1 | 768.0  | 27.1 |
| M       | 1    | developmental delay, rota virus                              | mild     | screening (stable) | 20.8 | 12.2   | 82.6    | 139.0 | 857.6  | 13.9 |
| F       | 1.0  | HHV-6 encephalopathy                                         | severe   | peak               | 48.8 | 64.0   | 309.2   | 260.3 | 854.8  | 23.3 |

|         |      |                                                                              |          |                    |      |       |       |       |        |      |
|---------|------|------------------------------------------------------------------------------|----------|--------------------|------|-------|-------|-------|--------|------|
| F       | 1.0  | Virus acute encephalopathy                                                   | severe   | peak               | 84.6 | 109.6 | 403.1 | 433.7 | 1150.2 | 27.4 |
| F       | 1.0  | Exanthema subitem encephalopathy                                             | severe   | initial            | 42.2 | 67.5  | 345.3 | 353.5 | 1061.3 | 25.0 |
| M       | 1.0  | HHV6 encephalopathy suspect                                                  | moderate | initial            | 32.8 | 16.7  | 148.2 | 166.0 | 714.2  | 18.9 |
| M       | 1    | acute encephalopathy with biphasic seizures and late reduced diffusion, HHV6 | moderate | unknown            | 17.6 | 3.9   | 90.9  | 121.1 | 724.8  | 14.3 |
| F       | 1    | influenza encephalopathy (A+ suspect)                                        | moderate | peak               | 28.5 | 10.0  | 56.1  | 312.1 | 825.2  | 27.4 |
| M       | 1    | acute encephalopathy                                                         | moderate | recovery           | 30.6 | 49.6  | 134.3 | 191.6 | 663.1  | 22.4 |
| M       | 1    | hypoxic ischemic encephalopathy                                              | moderte  | recovery           | 24.0 | 4.4   | 57.1  | 212.5 | 389.7  | 35.3 |
| M       | 1    | acute encephalopathy                                                         | moderate | initial            | 30.8 | 1.2   | 47.0  | 180.2 | 451.9  | 28.5 |
| F       | 1    | acute encephalopathy                                                         | moderate | screening (stable) | 45.9 | 12.0  | 116.1 | 321.4 | 1031.7 | 23.8 |
| M       | 1.0  | acute encephalopathy with biphasic seizures and late reduced diffusion       | severe   | initial            | 20.4 | 2.4   | 83.4  | 54.6  | 489.4  | 10.0 |
| F       | 1    | acute encephalopathy suspect                                                 | unknown  | initial            | 25.2 | 11.9  | 84.1  | 488.2 | 1124.3 | 30.3 |
| F       | 2    | periventricular leukomalacia, cerebral palsy, rhabdomyolysis                 | mild     | initial            | 21.0 | 27.8  | 157.6 | 225.9 | 861.9  | 20.8 |
| M       | 2    | artificial respiration, plumonary hypertension crisis                        | severe   | peak               | 11.1 | 13    | 96    | 149.8 | 424.3  | 26.1 |
| M       | 2    | asthma, lactacidemia                                                         | mild     | screening (stable) | 17.5 | 7.9   | 36.1  | 134.6 | 719.1  | 15.8 |
| unknown | 2.00 | asthma, lactacidemia                                                         | mild     | screening (stable) | 16.2 | 6.4   | 39.9  | 184.2 | 1198.7 | 13.3 |
| F       | 2.0  | VLCAD suspected, repeated hypoglycemia                                       | moderate | recovery           | 8.3  | 8.4   | 48.5  | 162.7 | 929.7  | 14.9 |
| F       | 2.0  | carnitine deficiency suspect                                                 | mild     | screening (stable) | 5.8  | 5.9   | 60.9  | 128.0 | 746.9  | 14.6 |

|   |     |                                                                                        |          |                    |      |       |                    |       |        |      |
|---|-----|----------------------------------------------------------------------------------------|----------|--------------------|------|-------|--------------------|-------|--------|------|
| F | 2   | shock, congenital heart disease (PA, VSD post op.), carnitine deficiency, hypoglycemia | moderate | peak               | 95.1 | 303.5 | 1022. <sub>1</sub> | 263.2 | 850.3  | 23.6 |
| F | 2   | ketotic hypoglycemia, vomiting                                                         | mild     | initial            | 17.6 | 0.5   | 21.2               | 113.1 | 612.3  | 15.6 |
| M | 2   | liver dysfunction                                                                      | moderate | recovery           | 35.5 | 12.3  | 89.2               | 81.8  | 821.5  | 9.1  |
| F | 2   | severe myoclonic epilepsy                                                              | severe   | recovery           | 21.8 | 13.9  | 61.8               | 85.3  | 393.6  | 17.8 |
| M | 2   | left-handed convulsion                                                                 | mild     | screening (stable) | 11.2 | 10.2  | 72.0               | 178.1 | 1044.2 | 14.6 |
| F | 2   | convulsion, hypoglycemia                                                               | moderate | recovery           | 28.0 | 9.0   | 65.8               | 380.7 | 1060.2 | 26.4 |
| M | 2   | convulsive seizure                                                                     | severe   | peak               | 34.3 | 16.6  | 130.6              | 174.9 | 1156.4 | 13.1 |
| M | 2   | febrile convulsion                                                                     | mild     | recovery           | 24.0 | 15.4  | 58.3               | 201.5 | 917.2  | 18.0 |
| F | 2   | convulsive seizure                                                                     | severe   | recovery           | 33.6 | 18.8  | 110.8              | 229.8 | 736.3  | 23.8 |
| M | 2   | hypoglycemic attack                                                                    | moderate | screening (stable) | 12.3 | 7.6   | 36.8               | 195.3 | 1229.8 | 13.7 |
| F | 2   | MR                                                                                     | mild     | screening (stable) | 17.8 | 8.1   | 77.8               | 143.8 | 670.4  | 17.7 |
| F | 2   | HHV-6 encephalopathy                                                                   | mild     | screening (stable) | 25.4 | 5.3   | 42.9               | 73.7  | 659.1  | 10.1 |
| F | 2   | viral encephalopathy, influenza                                                        | moderate | recovery           | 12.9 | 7.4   | 40.1               | 87.5  | 375.4  | 18.9 |
| M | 2.0 | encephalopathy, unknown virus-related                                                  | severe   | peak               | 15.6 | 18.9  | 101.4              | 174.3 | 1201.3 | 12.7 |
| M | 2   | acute encephalopathy                                                                   | moderate | peak               | 15.1 | 14.7  | 92.6               | 257.3 | 917.4  | 21.9 |
| M | 2   | acute encephalopathy                                                                   | severe   | recovery           | 36.1 | 0.7   | 71.9               | 172.0 | 509.1  | 25.3 |
| M | 2   | acute encephalopathy                                                                   | moderate | screening (stable) | 26.2 | 18.8  | 98.4               | 120.0 | 768.2  | 13.5 |
| F | 2   | Leigh encephalopathy                                                                   | mild     | peak               | 18.6 | 1.4   | 64.5               | 124.7 | 448.7  | 21.7 |
| F | 2   | epilepsy, acute encephalopathy with biphasic seizures and late reduced diffusion       | severe   | peak               | 3.4  | 9.3   | 79.8               | 130.4 | 579.6  | 18.4 |
| M | 2.0 | secondary carnitine deficiency, post hypoglycemia (glu 16 mg/dl)                       | moderate | recovery           | 20.4 | 10.5  | 68.3               | 448.9 | 1263.7 | 26.2 |
| F | 3   | rhabdomyolysis, Hypernatremia, Adeno, Rota +                                           | moderate | recovery           | 18.3 | 12.3  | 63.0               | 123.8 | 817.8  | 13.1 |

|         |      |                                                                                       |          |                    |       |        |        |       |        |      |
|---------|------|---------------------------------------------------------------------------------------|----------|--------------------|-------|--------|--------|-------|--------|------|
| M       | 3.0  | carnitine deficiency                                                                  | mild     | recovery           | 32.9  | 19.8   | 115.0  | 88.5  | 419.8  | 17.4 |
| F       | 3.0  | hypocarnitinemia, under carnitine administration                                      | mild     | screening (stable) | 24.6  | 9.0    | 69.2   | 134.4 | 901.6  | 13.0 |
| M       | 3.0  | cyclic vomiting                                                                       | moderate | recovery           | 16.9  | 7.7    | 54.9   | 133.3 | 896.9  | 12.9 |
| F       | 3.00 | afebrile convulsion                                                                   | mild     | screening (stable) | 13.5  | 19.2   | 24.5   | 126.2 | 604.0  | 17.3 |
| F       | 3    | hypoglycemia attack                                                                   | mild     | screening (stable) | 18.1  | 4.0    | 58.9   | 121.4 | 787.9  | 13.4 |
| F       | 3    | Low glucose                                                                           | mild     | screening (stable) | 30.7  | 5.8    | 99.0   | 220.9 | 1149.3 | 16.1 |
| F       | 3.0  | ketotic hypoglycemia, impaired consciousness                                          | moderate | screening (stable) | 32.9  | 8.6    | 29.9   | 118.6 | 612.3  | 16.2 |
| M       | 3    | rota virus encephalopathy                                                             | moderate | recovery           | 13.0  | 12.5   | 57.9   | 118.0 | 660.4  | 15.2 |
| M       | 3    | rota virus encephalopathy                                                             | moderate | recovery           | 0.8   | 0.5    | 3.1    | 75.5  | 659.4  | 10.3 |
| M       | 3.0  | encephalopathy (virus unknown)                                                        | severe   | recovery           | 1.5   | 5.6    | 58.8   | 104.0 | 626.5  | 14.2 |
| M       | 3    | acute encephalopathy with biphasic seizures and late reduced diffusion, unknown virus | severe   | recovery           | 7.8   | 5.4    | 64.9   | 104.6 | 515.8  | 16.9 |
| M       | 3.0  | rotavirus encephalopathy                                                              | severe   | recovery           | 1.1   | 4.7    | 64.5   | 175.3 | 364.2  | 32.5 |
| M       | 3    | influenza encephalopathy (B+)                                                         | moderate | initial            | 17.9  | 17.7   | 88.3   | 377.4 | 757.2  | 33.3 |
| M       | 3    | influenza encephalopathy (A+)                                                         | severe   | peak               | 68.9  | 638.6  | 1212.0 | 323.2 | 293.5  | 52.4 |
| unknown | 3    | influenza encephalopathy                                                              | severe   | initial            | 158.5 | 1933.9 | 3226.7 | 516.1 | 811.6  | 38.9 |
| F       | 3.0  | acute encephalopathy, brain edema, VLCAD deficiency, influenza                        | moderate | recovery           | 13.5  | 8.9    | 31.0   | 179.2 | 880.1  | 16.9 |
| F       | 3.0  | rota virus encephalopathy                                                             | severe   | peak               | 29.5  | 16.3   | 93.3   | 237.5 | 754.1  | 23.9 |
| F       | 3    | acute encephalopathy with biphasic seizures and late reduced diffusion                | moderate | screening (stable) | 15.4  | 8.4    | 64.1   | 285.0 | 853.1  | 25.0 |
| M       | 3    | epileptic encephalopathy                                                              | moderate | screening (stable) | 29.2  | 5.5    | 63.8   | 199.9 | 764.7  | 20.7 |



|         |      |                                                         |          |                    |      |      |       |       |        |      |
|---------|------|---------------------------------------------------------|----------|--------------------|------|------|-------|-------|--------|------|
| F       | 3    | acute encephalopathy                                    | moderate | initial            | 25.0 | 25.0 | 156.3 | 288.0 | 689.4  | 29.5 |
| M       | 3    | hypoxic ischemic encephalopathy                         | moderate | initial            | 39.0 | 23.8 | 109.6 | 354.8 | 575.7  | 38.1 |
| M       | 4.00 | rhabdomyolysis                                          | mild     | peak               | 23.9 | 10.8 | 92.0  | 210.6 | 1032.6 | 16.9 |
| M       | 4.00 | bronchitis, hypoglycemia                                | moderate | screening (stable) | 18.7 | 6.2  | 28.0  | 149.4 | 775.3  | 16.2 |
| F       | 4.0  | unknown virus related hepatitis (herpangina)            | moderate | recovery           | 15.9 | 14.1 | 67.7  | 188.1 | 1042.3 | 15.3 |
| F       | 4.0  | reccurent vomitting, hypoglycemia, developmental delay  | mild     | initial            | 20.4 | 8.3  | 60.0  | 409.4 | 1126.7 | 26.6 |
| M       | 4    | liver disorder                                          | moderate | screening (stable) | 19.6 | 16.9 | 101.2 | 119.2 | 697.1  | 14.6 |
| F       | 4.0  | hypoglycemia                                            | mild     | screening (stable) | 27.9 | 10.9 | 73.5  | 160.7 | 1054.5 | 13.2 |
| unknown | 4    | Hypr-CK-emia                                            | mild     | screening (stable) | 40.2 | 7.2  | 52.2  | 138.6 | 611.1  | 18.5 |
| M       | 4    | GA II suspect                                           | unknown  | screening (stable) | 33.0 | 7.3  | 89.4  | 706.4 | 1384.0 | 33.8 |
| M       | 4    | hyperlactatemia                                         | moderate | recovery           | 20.2 | 7.2  | 62.9  | 274.3 | 660.0  | 29.4 |
| M       | 4.0  | epilepsy, influenza encephalopathy, metabolic disorder? | moderate | screening (stable) | 20.1 | 0.7  | 28.1  | 120.9 | 546.9  | 18.1 |
| F       | 4    | hypoxic ischemic encephalopathy                         | moderate | recovery           | 25.1 | 27.7 | 188.5 | 278.5 | 622.4  | 30.9 |
| F       | 4    | acute encephalopathy                                    | moderate | initial            | 40.9 | 5.1  | 64.7  | 148.8 | 582.7  | 20.3 |
| F       | 4    | acute encephalopathy                                    | moderate | initial            | 20.6 | 8.9  | 57.9  | 99.3  | 399.5  | 19.9 |
| M       | 5.0  | secondary carnitine deficiency                          | mild     | recovery           | 14.9 | 6.6  | 50.2  | 456.7 | 1067.8 | 30.0 |
| F       | 5.0  | unconsciousness, vomiting                               | moderate | recovery           | 13.1 | 3.2  | 48.0  | 111.0 | 764.2  | 12.7 |
| F       | 5.00 | hepatosplenomegaly                                      | moderate | screening (stable) | 24.3 | 6.4  | 33.8  | 61.9  | 324.6  | 16.0 |
| F       | 5    | ketoacidosis, hypoglycemia                              | moderate | initial            | 2.7  | 9.6  | 55.6  | 111.7 | 676.8  | 14.2 |
| F       | 5.0  | hyperlactatemia                                         | mild     | screening (stable) | 29.3 | 24.2 | 82.3  | 194.9 | 923.8  | 17.4 |
| M       | 5    | periodic paralysis suspect, GAII suspect                | mild     | screening (stable) | 19.1 | 11.3 | 85.7  | 176.8 | 1025.4 | 14.7 |

|   |     |                                                                             |          |                    |      |      |       |       |        |      |
|---|-----|-----------------------------------------------------------------------------|----------|--------------------|------|------|-------|-------|--------|------|
| F | 5   | acute encephalopathy with biphasic seizures and late reduced diffusion (B+) | moderate | initial            | 29.4 | 22.1 | 123.5 | 638.9 | 1139.9 | 35.9 |
| M | 5   | acute encephalopathy                                                        | moderate | initial            | 29.3 | 15.7 | 84.6  | 253.0 | 686.4  | 26.9 |
| M | 5.0 | hypoxic ischemic encephalopathy                                             | severe   | unknown            | 16.9 | 8.5  | 63.1  | 241.9 | 586.0  | 29.2 |
| M | 5.0 | Leigh encephalopathy (suspect)                                              | mild     | initial            | 27.5 | 16.5 | 94.3  | 184.9 | 635.4  | 22.5 |
| M | 5   | Ifosfamide encephalopathy                                                   | unknown  | unknown            | 23.5 | 13.5 | 101.4 | 500.9 | 656.8  | 43.3 |
| M | 5   | febrile convulsion, ADHD, encephalopathy, hypotonic                         | mild     | peak               | 19.9 | 11.3 | 64.5  | 105.4 | 659.6  | 13.8 |
| F | 6.0 | chronic lung disease, cyclic vomiting                                       | mild     | unknown            | 22.3 | 5.1  | 27.0  | 213.3 | 907.8  | 19.0 |
| M | 6   | cyclic vomiting                                                             | mild     | initial            | 12.7 | 11.8 | 50.4  | 171.9 | 757.7  | 18.5 |
| F | 6.0 | lissencephaly with Infantile spasms                                         | moderate | screening (stable) | 24.8 | 6.9  | 71.3  | 226.6 | 639.1  | 26.2 |
| F | 6   | complex partial status epilepsy                                             | moderate | screening (stable) | 16.8 | 42.6 | 27.3  | 84.0  | 457.8  | 15.5 |
| F | 6   | viral acute encephalopathy, hypophosphatasia                                | moderate | recovery           | 24.1 | 18.4 | 108.7 | 330.2 | 643.4  | 33.9 |
| F | 6   | influenza encephalopathy suspect                                            | unknown  | unknown            | 18.5 | 5.5  | 69.9  | 140.7 | 719.1  | 16.4 |
| F | 6.0 | influenza encephalopathy (B+ suspect)                                       | moderate | initial            | 19.8 | 9.8  | 62.7  | 394.2 | 705.4  | 35.8 |
| M | 6.0 | influenza encephalopathy                                                    | moderate | recovery           | 17.3 | 32.6 | 30.0  | 87.1  | 404.7  | 17.7 |
| M | 6   | acute focal bacterial nephritis encephalopathy suspect                      | moderate | screening (stable) | 33.5 | 24.2 | 139.8 | 430.7 | 1134.9 | 27.5 |
| M | 7   | myositis due to influenza, rhabdomyolysis                                   | moderate | peak               | 19.9 | 8.7  | 76.2  | 166.8 | 833.7  | 16.7 |
| M | 7.0 | VLCAD                                                                       | mild     | peak               | 19.6 | 12.4 | 65.2  | 233.1 | 973.1  | 19.3 |
| M | 7.0 | cyclic vomiting                                                             | mild     | screening (stable) | 16.2 | 6.4  | 52.0  | 116.1 | 711.8  | 14.0 |

|         |      |                                                                    |          |                    |      |      |       |       |        |      |
|---------|------|--------------------------------------------------------------------|----------|--------------------|------|------|-------|-------|--------|------|
| M       | 7    | recurrent liver dysfunction                                        | mild     | screening (stable) | 19.6 | 9.3  | 64.3  | 390.3 | 966.6  | 28.8 |
| F       | 7    | mental deficiency, neurogenic paralysis, epilepsy                  | moderate | screening (stable) | 14.3 | 3.9  | 41.7  | 157.0 | 666.0  | 19.1 |
| M       | 7    | partial seizure, West syndrome, neonatal asphyxia                  | moderate | screening (stable) | 14.4 | 12.0 | 48.3  | 143.0 | 649.1  | 18.1 |
| unknown | 7    | FDPase deficiency suspect, ketotic hypoglycemia                    | unknown  | screening (stable) | 17.8 | 8.4  | 80.7  | 446.6 | 925.8  | 32.5 |
| M       | 7.0  | hyper-CK-emia                                                      | mild     | initial            | 27.9 | 37.5 | 24.5  | 113.0 | 506.8  | 18.2 |
| M       | 7    | acute encephalopathy                                               | severe   | recovery           | 12.0 | 16.7 | 88.9  | 115.9 | 456.1  | 20.3 |
| M       | 7    | encephalopathy                                                     | moderate | screening (stable) | 2.2  | 1.5  | 31.6  | 73.1  | 527.8  | 12.2 |
| F       | 7    | acute encephalopathy                                               | unknown  | unknown            | 11.6 | 9.0  | 55.4  | 400.7 | 769.7  | 34.2 |
| M       | 7    | acute encephalopathy, seizure                                      | moderate | recovery           | 11.1 | 4.7  | 71.5  | 139.6 | 591.5  | 19.1 |
| M       | 8.0  | kidney stone                                                       | unknown  | screening (stable) | 24.3 | 6.4  | 54.3  | 153.1 | 857.1  | 15.2 |
| M       | 8.00 | vomiting, influenza                                                | mild     | initial            | 15.3 | 7.9  | 19.7  | 121.4 | 669.4  | 15.4 |
| M       | 8.0  | acetone vomiting                                                   | mild     | recovery           | 22.0 | 7.8  | 52.3  | 162.7 | 905.0  | 15.2 |
| M       | 8    | cyclic vomiting, a bilious attack                                  | mild     | screening (stable) | 21.7 | 7.0  | 60.1  | 175.6 | 1008.7 | 14.8 |
| M       | 8.0  | Asperger syndrome, epileptic seizure, EEG, Roland epilepsy suspect | mild     | screening (stable) | 4.6  | 9.4  | 56.7  | 152.4 | 676.3  | 18.4 |
| F       | 8.00 | hyperammonemia, febrile convulsion, influenza A                    | moderate | peak               | 11.1 | 74.3 | 292.6 | 840.7 | 25.8   | 97.0 |
| M       | 8.0  | influenza encephalopathy                                           | moderate | screening (stable) | 16.5 | 7.1  | 68.6  | 159.5 | 752.9  | 17.5 |
| F       | 8    | influenza encephalopathy                                           | moderate | recovery           | 29.9 | 5.7  | 65.8  | 148.1 | 422.8  | 25.9 |
| M       | 8.0  | influenza A+ encephalopathy, influenza pneumonia                   | moderate | recovery           | 29.9 | 2.9  | 97.3  | 271.9 | 607.4  | 30.9 |
| M       | 8.0  | influenza encephalopathy                                           | moderate | recovery           | 22.2 | 15.0 | 40.3  | 139.2 | 627.9  | 18.1 |
| F       | 8    | encephalopathy, unknown virus                                      | severe   | recovery           | 33.1 | 5.6  | 59.5  | 160.2 | 696.5  | 18.7 |
| M       | 8    | acute encephalopathy                                               | moderate | unknown            | 49.5 | 21.3 | 129.5 | 147.1 | 283.6  | 34.1 |

|         |      |                                                       |          |                    |       |       |       |       |        |      |
|---------|------|-------------------------------------------------------|----------|--------------------|-------|-------|-------|-------|--------|------|
| M       | 8    | acute encephalopathy                                  | severe   | peak               | 29.2  | 15.1  | 126.9 | 357.2 | 859.7  | 29.4 |
| M       | 8    | acute encephalopathy                                  | moderate | unknown            | 16.3  | 16.1  | 62.8  | 162.5 | 590.0  | 21.6 |
| F       | 9.0  | epilepsy, asthma                                      | mild     | screening (stable) | 16.9  | 10.3  | 75.5  | 581.0 | 1043.9 | 35.8 |
| M       | 9    | acetonc vomiting                                      | mild     | initial            | 14.0  | 8.5   | 66.0  | 110.6 | 670.9  | 14.2 |
| M       | 9    | fulminant hepatic failure                             | severe   | peak               | 31.3  | 23.7  | 130.2 | 154.9 | 491.6  | 24.0 |
| F       | 9.0  | MR                                                    | mild     | screening (stable) | 15.8  | 6.7   | 49.0  | 175.2 | 712.7  | 19.7 |
| F       | 9    | acute encephalopathy                                  | moderate | recovery           | 22.1  | 13.1  | 68.2  | 161.4 | 452.2  | 26.3 |
| F       | 9.5  | influenza A+ encephalopathy                           | severe   | peak               | 21.0  | 7.9   | 55.6  | 214.6 | 484.7  | 30.7 |
| M       | 10   | cyclic vomiting                                       | mild     | screening (stable) | 22.9  | 9.0   | 76.6  | 405.6 | 998.8  | 28.9 |
| unknown | 10.0 | recurrent myopathy                                    | moderate | recovery           | 25.0  | 7.0   | 68.5  | 415.3 | 1133.9 | 26.8 |
| F       | 10.0 | hypoxic ischemic encephalopathy                       | moderate | initial            | 20.6  | 12.1  | 101.4 | 426.8 | 1005.7 | 29.8 |
| M       | 10   | acute encephalopathy, gall stone, choledocholithiasis | moderate | initial            | 19.2  | 19.7  | 158.5 | 243.5 | 663.6  | 26.8 |
| M       | 11   | vomiting, liver dysfunction                           | moderate | recovery           | 16.6  | 8.2   | 67.5  | 116.0 | 840.2  | 12.1 |
| F       | 11.0 | tonic-clonic seizure, rash                            | moderate | recovery           | 24.8  | 5.3   | 79.8  | 95.4  | 470.1  | 16.9 |
| F       | 11   | myoclonic epilepsy                                    | mild     | screening (stable) | 12.6  | 6.5   | 42.2  | 145.1 | 807.6  | 15.2 |
| F       | 11.0 | myopathy, rhabdomyolysis                              | moderate | recovery           | 1.4   | 7.5   | 7.9   | 4.8   | 484.7  | 1.0  |
| F       | 11   | viral acute encephalopathy suspect                    | moderate | peak               | 27.6  | 21.2  | 195.3 | 194.2 | 359.6  | 35.1 |
| M       | 11   | influenza encephalopathy (A+)                         | moderate | recovery           | 20.8  | 10.9  | 108.7 | 731.3 | 1188.9 | 38.1 |
| M       | 11   | encephalopathy, metabolic disorder?, influenza B+     | mild     | recovery           | 21.6  | 10.2  | 73.8  | 335.1 | 722.6  | 31.7 |
| F       | 12.0 | mycoplasma pneumonia                                  | mild     | peak               | 2.2   | 16.9  | 83.9  | 101.5 | 504.1  | 16.8 |
| M       | 12   | influenza encephalopathy (B+ )                        | severe   | initial            | 18.5  | 136.9 | 826.7 | 152.4 | 217.8  | 41.2 |
| M       | 12   | influenza encephalopathy (A+)                         | mild     | screening (stable) | 85.0  | 13.5  | 84.4  | 235.8 | 832.1  | 22.1 |
| M       | 12.0 | influenza encephalopathy (A+)                         | moderate | screening (stable) | 52.9  | 10.1  | 61.7  | 214.0 | 881.2  | 19.5 |
| F       | 12   | influenza encephalopathy (B+)                         | severe   | initial            | 105.6 | 278.0 | 658.4 | 412.3 | 457.7  | 47.4 |

|   |      |                                                                 |          |                    |      |       |       |       |       |      |
|---|------|-----------------------------------------------------------------|----------|--------------------|------|-------|-------|-------|-------|------|
| M | 13   | carnitine deficiency, renal tubular dysfunction, cardiomegaly   | moderate | screening (stable) | 20.1 | 5.7   | 44.5  | 124.8 | 687.7 | 15.4 |
| M | 13   | rhabdomyolysis                                                  | moderate | screening (stable) | 20.9 | 6.0   | 57.2  | 92.3  | 594.9 | 13.4 |
| M | 13.0 | hematuria, hyper-CK-emia                                        | mild     | screening (stable) | 19.1 | 9.7   | 51.7  | 190.7 | 806.5 | 19.1 |
| F | 13   | influenza encephalopathy (B+)                                   | moderate | initial            | 50.8 | 49.1  | 190.5 | 278.4 | 437.6 | 38.9 |
| M | 13   | acute encephalopathy                                            | mild     | screening (stable) | 15.4 | 0.4   | 12.7  | 154.4 | 613.8 | 20.1 |
| M | 14.0 | carnitine deficiency suspect                                    | mild     | screening (stable) | 21.2 | 5.0   | 42.4  | 100.9 | 589.0 | 14.6 |
| M | 14   | fatty liver                                                     | mild     | screening (stable) | 18.9 | 9.2   | 68.7  | 146.7 | 655.7 | 18.3 |
| M | 14   | metabolic myopathy suspect                                      | mild     | screening (stable) | 18.2 | 6.4   | 41.1  | 78.4  | 525.3 | 13.0 |
| F | 14.0 | CPA post influenza A                                            | severe   | peak               | 4.2  | 23.8  | 97.3  | 101.2 | 350.5 | 22.4 |
| M | 14.0 | fever, influenza B+ encephalopathy, multiple organ failure, DIC | severe   | peak               | 46.6 | 186.0 | 766.5 | 232.4 | 422.8 | 35.5 |
| M | 14   | influenza encephalopathy (B+)                                   | moderate | recovery           | 71.4 | 9.0   | 62.4  | 90.8  | 376.8 | 19.4 |
| M | 14   | influenza encephalopathy (B+)                                   | moderate | initial            | 78.0 | 13.4  | 84.3  | 115.1 | 388.2 | 22.9 |
| F | 14   | acute encephalopathy                                            | moderate | peak               | 33.2 | 7.9   | 75.0  | 96.4  | 296.4 | 24.5 |
| M | 14.2 | influenza encephalopathy (A+)                                   | moderate | initial            | 21.4 | 7.7   | 74.8  | 181.8 | 526.3 | 25.7 |
| M | 15.0 | muscle weakness                                                 | mild     | screening (stable) | 1.1  | 7.1   | 35.9  | 81.0  | 307.5 | 20.9 |
| F | 15.0 | ventricular tachycardia                                         | moderate | screening (stable) | 16.9 | 3.8   | 36.3  | 51.7  | 316.4 | 14.0 |
| F | 15   | influenza A+ encephalopathy (suspect)                           | moderate | initial            | 20.8 | 24.5  | 84.4  | 255.6 | 329.2 | 43.7 |
| M | 15   | acute lymphocytic leukemia, encephalopathy, hyperammonemia      | moderate | recovery           | 15.5 | 14.7  | 77.9  | 74.5  | 296.7 | 20.1 |
| M | 17   | hyper-CK-emia, severe muscle ache                               | moderate | peak               | 19.6 | 5.6   | 46.2  | 71.4  | 396.5 | 15.3 |
| M | 17.0 | acute encephalopathy                                            | mild     | screening (stable) | 24.8 | 6.7   | 34.6  | 70.5  | 148.6 | 32.2 |
| M | 20   | acute encephalopathy                                            | mild     | screening (stable) | 44.1 | 11.6  | 79.8  | 131.4 | 546.8 | 19.4 |

|         |      |                                                |          |                    |      |      |      |       |       |      |
|---------|------|------------------------------------------------|----------|--------------------|------|------|------|-------|-------|------|
| unknown | 26   | CP, epilepsy, MR, asthma, testicular cancer    | mild     | screening (stable) | 15.6 | 5.6  | 48.6 | 32.6  | 204.6 | 13.7 |
| F       | 26   | hyper-CK-emia                                  | moderate | screening (stable) | 20.1 | 4.6  | 30.9 | 43.3  | 196.1 | 18.1 |
| F       | 37   | leukoencephalopathy suspect                    | mild     | screening (stable) | 17.2 | 4.7  | 32.5 | 105.5 | 185.5 | 36.2 |
| F       | 40.0 | encephalitis, hyper-CK-emia                    | mild     | screening (stable) | 14.5 | 6.2  | 39.7 | 33.4  | 226.5 | 12.8 |
| F       | 41   | Ifosfamide encephalopathy                      | unknown  | unknown            | 43.6 | 7.5  | 45.5 | 64.9  | 204.5 | 24.1 |
| M       | 43   | leukoencephalopathy (CADASIL syndrome suspect) | mild     | screening (stable) | 3.8  | 9.8  | 43.5 | 136.4 | 369.7 | 26.9 |
| M       | 54   | hyper-CK-emia, stiffness of back               | mild     | screening (stable) | 17.9 | 5.7  | 44.5 | 86.8  | 334.3 | 20.6 |
| F       | 57   | Ifosfamide encephalopathy                      | unknown  | unknown            | 65.0 | 11.0 | 67.3 | 93.3  | 513.0 | 15.4 |
| F       | 59.0 | Ifosfamide encephalopathy                      | unknown  | unknown            | 61.7 | 9.8  | 59.5 | 106.9 | 286.9 | 27.1 |
| F       | 60   | Ifosfamide encephalopathy                      | moderate | recovery           | 89.7 | 12.0 | 88.0 | 62.5  | 280.7 | 18.2 |
| M       | 62   | leukoencephalopathy                            | unknown  | unknown            | 20.5 | 4.8  | 38.1 | 102.2 | 305.2 | 25.1 |

Abbreviations: M=male, F=female, DiHS-OS= *O*-sulfated heparan sulfate, DiHS-NS= *N*-sulfated heparan sulfate, Di4S= dermatan sulfate, KS= keratan sulfate

**Table S2:** Patients with mucopolysaccharidoses and corresponding glycosaminoglycan levels (ng/mL).

| Age         | Diagnosis | DiHS-OS | DiHS-NS | Di-4S | KS     | Di KS | Mono KS | DiKS/Total KS |
|-------------|-----------|---------|---------|-------|--------|-------|---------|---------------|
| 13.1        | MPS I     | 47.8    | 9.8     | 1.9   | 1379.8 | 327.4 | 1379.8  | 19.2          |
| 13.09041096 | MPS I     | 63.2    | 8.9     | 3.1   | 973.3  | 226.7 | 973.3   | 18.9          |
| 3.8         | MPS II    | 140.5   | 84.7    | 170.6 | 1084.5 | 256.0 | 1084.5  | 19.1          |
| 3.8         | MPS II    | 65.3    | 62.3    | 137.3 | 1878.8 | 403.1 | 1878.8  | 17.7          |
| 4           | MPS II    | 219.0   | 72.3    | 222.8 | 1331.5 | 255.3 | 1331.5  | 16.1          |
| 4           | MPS II    | 114.1   | 30.7    | 39.3  | 915.4  | 171.7 | 915.4   | 15.8          |
| 4           | MPS II    | 185.4   | 55.0    | 180.1 | 1306.7 | 185.6 | 1306.7  | 12.4          |
| 4           | MPS II    | 98.0    | 45.5    | 35.4  | 1085.4 | 182.2 | 1085.4  | 14.4          |
| 4.663       | MPS II    | 222.1   | 18.1    | 6.2   | 1816.8 | 187.3 | 1816.8  | 9.3           |
| 9           | MPS II    | 289.2   | 80.4    | 201.1 | 1640.7 | 525.5 | 1640.7  | 24.3          |
| 9           | MPS II    | 110.2   | 34.5    | 78.2  | 1031.6 | 311.5 | 1031.6  | 23.2          |
| 5           | MPS II    | 292.6   | 92.5    | 314.5 | 1143.9 | 249.8 | 1143.9  | 17.9          |
| 5           | MPS II    | 80.5    | 25.2    | 45.7  | 1058.3 | 279.9 | 1058.3  | 20.9          |
| 7           | MPS II    | 100.8   | 24.3    | 54.2  | 819.5  | 228.1 | 819.5   | 21.8          |
| 7           | MPS II    | 176.2   | 50.4    | 198.3 | 1336.9 | 381.4 | 1336.9  | 22.2          |
| 8           | MPS II    | 392.9   | 84.6    | 135.8 | 2198.3 | 525.2 | 2198.3  | 19.3          |
| 6           | MPS II    | 147.9   | 43.7    | 80.9  | 2093.3 | 556.8 | 2093.3  | 21.0          |
| 7.7         | MPS II    | 57.5    | 19.8    | 48.3  | 1556.9 | 458.0 | 1556.9  | 22.7          |
| 5.2         | MPS II    | 80.0    | 18.6    | 43.7  | 1766.5 | 427.3 | 1766.5  | 19.5          |
| 9.9         | MPS II    | 35.5    | 7.8     | 24.8  | 795.0  | 272.9 | 795.0   | 25.6          |
| 9.8         | MPS II    | 198.5   | 45.5    | 287.8 | 1641.9 | 404.6 | 1641.9  | 19.8          |
| 9.5         | MPS II    | 74.1    | 68.0    | 38.1  | 1775.0 | 426.0 | 1775.0  | 19.4          |
| 8.5         | MPS II    | 111.2   | 71.6    | 89.7  | 1385.8 | 344.4 | 1385.8  | 19.9          |
| 9.3         | MPS II    | 249.4   | 98.5    | 295.7 | 1619.5 | 402.3 | 1619.5  | 19.9          |
| 5           | MPS II    | 197.4   | 53.9    | 143.1 | 1908.8 | 516.9 | 1908.8  | 21.3          |

|      |          |       |       |       |        |       |        |      |
|------|----------|-------|-------|-------|--------|-------|--------|------|
| 6    | MPS II   | 205.1 | 55.6  | 121.6 | 925.1  | 173.8 | 925.1  | 15.8 |
| 10.4 | MPS II   | 249.2 | 80.1  | 397.5 | 1617.4 | 424.6 | 1617.4 | 20.8 |
| 10.7 | MPS II   | 41.4  | 14.1  | 37.3  | 850.7  | 270.3 | 850.7  | 24.1 |
| 12.3 | MPS II   | 71.7  | 18.1  | 39.9  | 1000.6 | 331.4 | 1000.6 | 24.9 |
| 10   | MPS II   | 166.5 | 50.9  | 193.2 | 1279.6 | 266.0 | 1279.6 | 17.2 |
| 10   | MPS II   | 69.7  | 19.0  | 26.6  | 613.2  | 139.0 | 613.2  | 18.5 |
| 11.1 | MPS II   | 301.1 | 121.5 | 40.7  | 621.5  | 201.7 | 621.5  | 24.5 |
| 12.3 | MPS II   | 73.1  | 61.6  | 70.5  | 2441.7 | 501.0 | 2441.7 | 17.0 |
| 13.2 | MPS II   | 120.9 | 84.1  | 163.4 | 761.3  | 192.2 | 761.3  | 20.2 |
| 13.1 | MPS II   | 54.8  | 70.8  | 48.0  | 1135.3 | 306.8 | 1135.3 | 21.3 |
| 15.2 | MPS II   | 49.6  | 67.4  | 35.1  | 787.4  | 183.3 | 787.4  | 18.9 |
| 15.5 | MPS II   | 38.7  | 12.3  | 24.2  | 977.1  | 278.6 | 977.1  | 22.2 |
| 19.5 | MPS II   | 61.1  | 62.5  | 51.8  | 739.5  | 204.9 | 739.5  | 21.7 |
| 18.8 | MPS II   | 46.8  | 64.5  | 35.4  | 409.3  | 103.9 | 409.3  | 20.2 |
| 15   | MPS II   | 65.3  | 70.5  | 50.9  | 1336.1 | 335.3 | 1336.1 | 20.1 |
| 19   | MPS II   | 138.5 | 20.8  | 55.8  | 1143.5 | 298.0 | 1143.5 | 20.7 |
| 15   | MPS II   | 413.2 | 289.9 | 594.2 | 380.0  | 139.7 | 380.0  | 26.9 |
| 21.7 | MPS II   | 177.0 | 100.5 | 210.3 | 1317.1 | 316.2 | 1317.1 | 19.4 |
| 25   | MPS II   | 36.5  | 13.0  | 30.0  | 496.0  | 163.1 | 496.0  | 24.7 |
| 20.5 | MPS II   | 27.0  | 63.6  | 25.6  | 547.9  | 144.5 | 547.9  | 20.9 |
| 35   | MPS II   | 27.7  | 58.6  | 25.2  | 677.5  | 218.5 | 677.5  | 24.4 |
| 26   | MPS II   | 31.9  | 58.9  | 27.3  | 759.0  | 153.9 | 759.0  | 16.9 |
| 23   | MPS II   | 27.7  | 69.3  | 22.5  | 444.2  | 115.2 | 444.2  | 20.6 |
| 29   | MPS II   | 165.2 | 41.1  | 6.5   | 971.1  | 268.5 | 971.1  | 21.7 |
| 6    | MPS IIIA | 93.3  | 30.5  | 16.1  | 401.4  | 101.5 | 401.4  | 20.2 |
| 9    | MPS IIIA | 190.3 | 52.2  | 32.1  | 787.9  | 215.8 | 787.9  | 21.5 |
| 13   | MPS IIIA | 94.3  | 27.6  | 23.0  | 401.4  | 135.1 | 401.4  | 25.2 |
| 16   | MPS IIIA | 117.0 | 33.9  | 21.7  | 243.2  | 42.2  | 243.2  | 14.8 |



|             |          |       |       |      |        |       |        |      |
|-------------|----------|-------|-------|------|--------|-------|--------|------|
| 17          | MPS IIIA | 99.4  | 26.9  | 11.3 | 410.7  | 129.3 | 410.7  | 23.9 |
| 27          | MPS IIIA | 85.1  | 26.5  | 13.6 | 331.0  | 93.6  | 331.0  | 22.1 |
| 4.5         | MPS IIIB | 327.2 | 106.3 | 36.3 | 849.5  | 220.6 | 849.5  | 20.6 |
| 4           | MPS IIIB | 189.2 | 53.0  | 24.2 | 701.7  | 162.4 | 701.7  | 18.8 |
| 6           | MPS IIIB | 131.2 | 46.1  | 19.2 | 427.1  | 116.1 | 427.1  | 21.4 |
| 8           | MPS IIIB | 82.8  | 23.1  | 15.6 | 330.6  | 96.3  | 330.6  | 22.6 |
| 9           | MPS IIIB | 116.1 | 38.4  | 17.3 | 321.8  | 87.0  | 321.8  | 21.3 |
| 9           | MPS IIIB | 214.4 | 74.8  | 33.8 | 730.2  | 207.0 | 730.2  | 22.1 |
| 7           | MPS IIIB | 163.1 | 45.1  | 27.0 | 418.3  | 114.8 | 418.3  | 21.5 |
| 14.5        | MPS IIIB | 56.3  | 14.9  | 17.9 | 421.2  | 86.2  | 421.2  | 17.0 |
| 12.8        | MPS IIIB | 212.6 | 65.1  | 21.8 | 929.1  | 246.3 | 929.1  | 21.0 |
| 27          | MPS IIIB | 140.2 | 44.3  | 15.3 | 171.2  | 57.0  | 171.2  | 25.0 |
| 24          | MPS IIIB | 229.7 | 50.7  | 27.3 | 401.1  | 64.4  | 401.1  | 13.8 |
| 3.4         | MPS IVA  | 38.2  | 9.2   | 2.4  | 1142.1 | 322.8 | 1142.1 | 22.0 |
| 3.6         | MPS IVA  | 15.9  | 1.3   | 2.6  | 642.8  | 160.2 | 642.8  | 20.0 |
| 3.380821918 | MPS IVA  | 65.2  | 13.6  | 1.1  | 761.0  | 272.0 | 761.0  | 26.3 |
| 6           | MPS IVA  | 102.1 | 52.9  | 10.6 | 319.3  | 107.8 | 319.3  | 25.2 |
| 7           | MPS IVA  | 76.6  | 47.2  | 8.3  | 235.1  | 4.5   | 235.1  | 1.9  |
| 8           | MPS IVA  | 449.1 | 226.4 | 25.2 | 1278.6 | 471.4 | 1278.6 | 26.9 |
| 9           | MPS IVA  | 12.0  | 20.9  | 9.8  | 360.0  | 106.6 | 360.0  | 22.8 |
| 6           | MPS IVA  | 35.3  | 2.7   | 2.9  | 894.3  | 293.9 | 894.3  | 24.7 |
| 9.3         | MPS IVA  | 11.0  | 3.3   | 3.2  | 412.1  | 104.4 | 412.1  | 20.2 |
| 7.75        | MPS IVA  | 45.5  | 4.3   | 1.3  | 997.0  | 281.2 | 997.0  | 22.0 |
| 7.739726027 | MPS IVA  | 34.1  | 8.1   | 2.5  | 985.3  | 287.2 | 985.3  | 22.6 |
| 6.857534247 | MPS IVA  | 47.3  | 7.3   | 3.4  | 1060.8 | 314.3 | 1060.8 | 22.9 |
| 8.8         | MPS IVA  | 43.5  | 6.4   | 11.3 | 1190.5 | 447.2 | 1190.5 | 27.3 |
| 6.25205479  | MPS IVA  | 57.1  | 4.7   | 1.5  | 1860.4 | 595.4 | 1860.4 | 24.2 |
| 8.4         | MPS IVA  | 23.7  | 5.2   | 2.2  | 814.4  | 233.7 | 814.4  | 22.3 |

|             |         |       |      |      |        |       |        |      |
|-------------|---------|-------|------|------|--------|-------|--------|------|
| 8.4         | MPS IVA | 22.7  | 4.8  | 2.9  | 1314.7 | 241.2 | 1314.7 | 15.5 |
| 8.9         | MPS IVA | 17.5  | 3.9  | 2.3  | 1159.9 | 220.5 | 1159.9 | 16.0 |
| 9.2         | MPS IVA | 17.7  | 3.6  | 2.3  | 1085.4 | 215.8 | 1085.4 | 16.6 |
| 10.5        | MPS IVA | 18.0  | 2.6  | 2.5  | 858.7  | 204.6 | 858.7  | 19.2 |
| 13.4        | MPS IVA | 12.8  | 1.1  | 2.2  | 422.1  | 82.8  | 422.1  | 16.4 |
| 10          | MPS IVA | 44.7  | 6.2  | 3.3  | 973.5  | 255.5 | 973.5  | 20.8 |
| 10          | MPS IVA | 78.4  | 36.9 | 15.5 | 339.8  | 183.2 | 339.8  | 35.0 |
| 12          | MPS IVA | 130.1 | 47.3 | 5.8  | 270.2  | 108.8 | 270.2  | 28.7 |
| 12.3945205  | MPS IVA | 20.2  | 3.3  | 1.4  | 645.9  | 143.1 | 645.9  | 18.1 |
| 12.16438356 | MPS IVA | 32.0  | 5.5  | 1.9  | 1181.2 | 313.4 | 1181.2 | 21.0 |
| 14          | MPS IVA | 20.7  | 1.4  | 1.1  | 365.9  | 98.0  | 365.9  | 21.1 |
| 17.9        | MPS IVA | 33.1  | 7.9  | 2.5  | 1015.1 | 230.2 | 1015.1 | 18.5 |
| 15          | MPS IVA | 30.9  | 8.8  | 21.2 | 929.2  | 259.2 | 929.2  | 21.8 |
| 17          | MPS IVA | 30.3  | 8.9  | 19.3 | 751.4  | 174.2 | 751.4  | 18.8 |
| 16          | MPS IVA | 32.1  | 6.0  | 2.8  | 1161.4 | 232.6 | 1161.4 | 16.7 |
| 16          | MPS IVA | 23.9  | 3.1  | 4.7  | 500.5  | 138.7 | 500.5  | 21.7 |
| 16          | MPS IVA | 24.0  | 2.1  | 6.6  | 305.2  | 74.9  | 305.2  | 19.7 |
| 15.3506849  | MPS IVA | 30.4  | 6.9  | 0.6  | 937.9  | 223.9 | 937.9  | 19.3 |
| 15          | MPS IVA | 128.6 | 63.4 | 9.0  | 189.3  | 67.2  | 189.3  | 26.2 |
| 15          | MPS IVA | 17.4  | 6.8  | 5.2  | 915.6  | 201.3 | 915.6  | 18.0 |
| 17          | MPS IVA | 16.7  | 7.5  | 2.3  | 644.4  | 147.1 | 644.4  | 18.6 |
| 18.09315068 | MPS IVA | 21.8  | 3.8  | 2.5  | 885.1  | 139.1 | 885.1  | 13.6 |
| 28.31506849 | MPS IVA | 17.2  | 3.8  | 2.0  | 451.3  | 88.1  | 451.3  | 16.3 |
| 48          | MPS IVA | 39.4  | 12.6 | 4.4  | 544.3  | 238.8 | 544.3  | 30.5 |
| 56          | MPS IVA | 16.1  | 5.4  | 2.6  | 265.6  | 44.2  | 265.6  | 14.3 |
| 26          | MPS IVA | 140.8 | 69.3 | 17.1 | 141.0  | 38.2  | 141.0  | 21.3 |
| 35          | MPS IVA | 106.7 | 52.8 | 15.2 | 144.5  | 63.7  | 144.5  | 30.6 |
| 12.7        | MPS IVB | 30.0  | 7.3  | 2.1  | 841.5  | 165.2 | 841.5  | 16.4 |

|      |         |       |       |      |       |       |       |      |
|------|---------|-------|-------|------|-------|-------|-------|------|
| 12.9 | MPS IVB | 22.4  | 4.3   | 1.9  | 966.2 | 229.4 | 966.2 | 19.2 |
| 17.4 | MPS IVB | 15.7  | 7.0   | 2.9  | 280.0 | 65.3  | 280.0 | 18.9 |
| 17.7 | MPS IVB | 13.4  | 3.7   | 3.7  | 464.5 | 98.2  | 464.5 | 17.5 |
| 18.3 | MPS IVB | 17.7  | 2.9   | 1.7  | 416.5 | 66.1  | 416.5 | 13.7 |
| 30   | MPS VII | 440.4 | 157.3 | 62.5 | 562.1 | 137.3 | 562.1 | 19.6 |
| 29   | MPS VII | 36.7  | 7.9   | 13.0 | 402.2 | 148.5 | 402.2 | 27.0 |

Abbreviations: DiHS-OS= *O*-sulfated heparan sulfate, DiHS-NS= *N*-sulfated heparan sulfate, Di-4S= dermatan sulfate, KS= total keratan sulfate, di KS= di-sulfated keratan sulfate, mono KS= mono-sulfated keratan sulfate.

**Table S3:** Control values for *O*-sulfated heparan sulfate (DiHS-0S) shown in ng/mL.

| Age         | DiHS-0S |
|-------------|---------|
| 0           | 107.4   |
| 0.0027      | 49.4    |
| 0.0109      | 104.0   |
| 0.0219      | 129.7   |
| 0.0356      | 113.8   |
| 0.0739      | 122.0   |
| 0.08219     | 23.6    |
| 0.08219     | 117.5   |
| 0.08219     | 111.1   |
| 0.083333333 | 101.8   |
| 0.083333333 | 121.2   |
| 0.117808219 | 63.0    |
| 0.12        | 46.8    |
| 0.175342466 | 114.5   |
| 0.246575342 | 68.2    |
| 0.2466      | 45.3    |
| 0.2466      | 104.4   |
| 0.25        | 120.3   |
| 0.320547945 | 114.7   |
| 0.3288      | 89.4    |
| 0.3288      | 137.2   |
| 0.345205479 | 96.6    |
| 0.353424658 | 66.1    |
| 0.36        | 110.5   |
| 0.40        | 96.9    |
| 0.4137      | 57.8    |

|             |       |
|-------------|-------|
| 0.4137      | 96.6  |
| 0.4137      | 114.4 |
| 0.416666667 | 127.2 |
| 0.416666667 | 121.7 |
| 0.42        | 42.4  |
| 0.48        | 44.0  |
| 0.4959      | 117.3 |
| 0.4959      | 100.4 |
| 0.50        | 81.8  |
| 0.56        | 46.6  |
| 0.5808      | 99.8  |
| 0.583333333 | 88.5  |
| 0.666666667 | 101.2 |
| 0.68        | 80.7  |
| 0.70        | 40.8  |
| 0.726027397 | 82.4  |
| 0.7479      | 50.7  |
| 0.7479      | 123.9 |
| 0.7479      | 123.6 |
| 0.7479      | 79.4  |
| 0.75        | 71.6  |
| 0.761643836 | 73.6  |
| 0.8329      | 63.8  |
| 0.8329      | 62.0  |
| 0.87        | 49.5  |
| 0.88        | 84.2  |
| 0.882191781 | 86.0  |
| 0.906849315 | 60.6  |

|             |       |
|-------------|-------|
| 0.9151      | 65.3  |
| 0.916666667 | 75.5  |
| 0.916666667 | 49.3  |
| 1           | 58.1  |
| 1           | 62.6  |
| 1           | 75.4  |
| 1           | 102.2 |
| 1           | 61.2  |
| 1           | 80.2  |
| 1           | 62.7  |
| 1           | 93.9  |
| 1           | 57.1  |
| 1           | 47.0  |
| 1           | 116.1 |
| 1           | 58.9  |
| 1           | 83.4  |
| 1           | 90.9  |
| 1           | 56.1  |
| 1           | 84.1  |
| 1           | 84.3  |
| 1           | 99.9  |
| 1           | 64.2  |
| 1           | 63.1  |
| 1           | 72.3  |
| 1           | 66.6  |
| 1           | 68.0  |
| 1           | 67.1  |
| 1           | 84.3  |

|             |       |
|-------------|-------|
| 1           | 72.1  |
| 1           | 58.9  |
| 1.01        | 63.2  |
| 1.019178082 | 104.1 |
| 1.030136986 | 61.8  |
| 1.03        | 27.7  |
| 1.04        | 31.4  |
| 1.08        | 84.5  |
| 1.101369863 | 43.9  |
| 1.197260274 | 84.5  |
| 1.32        | 28.4  |
| 1.51        | 23.6  |
| 1.539726027 | 79.7  |
| 1.684931507 | 66.0  |
| 1.704109589 | 82.6  |
| 1.74        | 57.4  |
| 1.775342466 | 72.7  |
| 1.83        | 32.8  |
| 1.860273973 | 89.9  |
| 2           | 48.5  |
| 2           | 101.4 |
| 2           | 92.6  |
| 2           | 42.9  |
| 2           | 71.9  |
| 2           | 98.4  |
| 2           | 64.5  |
| 2           | 53.3  |
| 2           | 89.2  |

|             |       |
|-------------|-------|
| 2           | 85.0  |
| 2           | 79.8  |
| 2           | 77.8  |
| 2           | 60.9  |
| 2           | 72.4  |
| 2           | 72.0  |
| 2.035616438 | 68.3  |
| 2.043835616 | 65.8  |
| 2.449315068 | 96.0  |
| 2.60        | 21.2  |
| 2.663013699 | 110.8 |
| 2.67        | 36.1  |
| 2.690410959 | 40.1  |
| 2.690410959 | 58.3  |
| 2.72        | 36.8  |
| 3.0         | 39.9  |
| 3           | 64.9  |
| 3           | 58.8  |
| 3           | 57.9  |
| 3           | 3.1   |
| 3           | 64.1  |
| 3           | 64.5  |
| 3           | 63.8  |
| 3           | 40.9  |
| 3           | 55.9  |
| 3           | 54.5  |
| 3           | 88.3  |
| 3           | 54.9  |

|             |      |
|-------------|------|
| 3           | 84.0 |
| 3           | 69.2 |
| 3           | 58.9 |
| 3.07        | 99.0 |
| 3.13        | 24.5 |
| 3.309589041 | 63.0 |
| 3.33        | 29.9 |
| 3.676712329 | 67.7 |
| 3.82739726  | 93.3 |
| 3.89        | 69.2 |
| 4           | 92.0 |
| 4           | 60.0 |
| 4           | 64.7 |
| 4           | 57.9 |
| 4           | 89.4 |
| 4           | 73.5 |
| 4           | 52.2 |
| 4.02        | 28.0 |
| 4.25        | 28.1 |
| 4.309589041 | 62.9 |
| 5           | 82.3 |
| 5           | 55.6 |
| 5           | 50.2 |
| 5           | 84.6 |
| 5           | 63.1 |
| 5           | 94.3 |
| 5           | 48.0 |
| 5           | 85.7 |

|             |      |
|-------------|------|
| 5.265753425 | 64.5 |
| 5.55        | 33.8 |
| 5.99        | 27.0 |
| 6           | 71.3 |
| 6           | 72.1 |
| 6           | 69.9 |
| 6           | 62.7 |
| 6.16        | 33.0 |
| 6.40        | 27.9 |
| 6.805479452 | 50.4 |
| 7           | 88.9 |
| 7           | 65.2 |
| 7           | 31.6 |
| 7           | 55.4 |
| 7           | 80.7 |
| 7           | 84.9 |
| 7           | 76.2 |
| 7           | 52.0 |
| 7           | 64.3 |
| 7           | 71.5 |
| 7.101369863 | 41.7 |
| 7.70        | 26.6 |
| 8           | 52.3 |
| 8           | 86.5 |
| 8           | 68.6 |
| 8           | 62.8 |
| 8           | 65.8 |
| 8           | 54.3 |

|             |      |
|-------------|------|
| 8           | 66.4 |
| 8           | 64.7 |
| 8           | 56.7 |
| 8.024657534 | 60.1 |
| 8.03        | 74.3 |
| 8.10        | 19.7 |
| 8.11        | 97.3 |
| 8.523287671 | 59.5 |
| 9           | 42.0 |
| 9           | 96.8 |
| 9           | 68.2 |
| 9           | 75.5 |
| 9           | 60.9 |
| 9           | 49.0 |
| 9           | 66.0 |
| 9.512328767 | 55.6 |
| 10          | 68.5 |
| 10.96164384 | 76.6 |
| 11          | 7.9  |
| 11          | 69.8 |
| 11          | 67.5 |
| 11          | 79.8 |
| 11.44931507 | 73.8 |
| 11.96164384 | 42.2 |
| 12          | 83.9 |
| 12          | 84.4 |
| 12          | 61.7 |
| 13          | 51.7 |

|             |      |
|-------------|------|
| 13          | 40.4 |
| 13          | 57.2 |
| 13          | 59.1 |
| 13          | 67.2 |
| 13.05205479 | 44.5 |
| 14          | 97.3 |
| 14          | 68.7 |
| 14          | 56.1 |
| 14          | 75.0 |
| 14          | 62.4 |

|       |      |
|-------|------|
| 14    | 84.3 |
| 14    | 41.1 |
| 14    | 42.4 |
| 14    | 38.6 |
| 14.21 | 74.8 |
| 15    | 35.9 |
| 15    | 77.9 |
| 15    | 84.4 |
| 15    | 35.7 |
| 15    | 36.3 |

|    |      |
|----|------|
| 16 | 73.1 |
| 17 | 34.6 |
| 17 | 46.2 |
| 20 | 79.8 |
| 20 | 75.3 |
| 26 | 30.9 |
| 26 | 48.6 |
| 34 | 42.9 |
| 39 | 49.3 |
| 40 | 39.7 |

|    |      |
|----|------|
| 41 | 45.5 |
| 43 | 43.5 |
| 52 | 34.3 |
| 54 | 44.5 |
| 57 | 67.3 |
| 59 | 59.5 |
| 60 | 88.0 |
| 62 | 38.1 |

**Table S4:** Control values for *N*-sulfated heparan sulfate (DiHS-NS) shown in ng/mL.

| Age         | DiHS-0S |  |             |      |  |             |      |  |             |
|-------------|---------|--|-------------|------|--|-------------|------|--|-------------|
| 0           | 27.5    |  | 0.3288      | 9.6  |  | 0.70        | 5.6  |  | 1           |
| 0           | 25.2    |  | 0.3288      | 14.7 |  | 0.726027397 | 13.1 |  | 1           |
| 0           | 21.6    |  | 0.345205479 | 17.4 |  | 0.7479      | 10.1 |  | 1           |
| 0.0027      | 14.5    |  | 0.353424658 | 20.1 |  | 0.7479      | 20.7 |  | 1           |
| 0.0109      | 18.2    |  | 0.364383562 | 20.5 |  | 0.7479      | 19.2 |  | 1           |
| 0.0219      | 21.0    |  | 0.36        | 6.4  |  | 0.7479      | 10.7 |  | 1           |
| 0.0356      | 16.7    |  | 0.40        | 8.2  |  | 0.75        | 7.3  |  | 1           |
| 0.038356164 | 22.6    |  | 0.4137      | 0.8  |  | 0.761643836 | 10.8 |  | 1           |
| 0.0384      | 14.8    |  | 0.4137      | 19.8 |  | 0.8329      | 1.5  |  | 1           |
| 0.0739      | 17.9    |  | 0.4137      | 9.8  |  | 0.8329      | 9.0  |  | 1           |
| 0.082       | 23.5    |  | 0.4137      | 12.4 |  | 0.8329      | 8.1  |  | 1           |
| 0.08219     | 2.0     |  | 0.4137      | 12.4 |  | 0.88        | 3.8  |  | 1           |
| 0.08219     | 16.1    |  | 0.416666667 | 24.8 |  | 0.882191781 | 11.9 |  | 1           |
| 0.08219     | 12.1    |  | 0.416666667 | 16.2 |  | 0.906849315 | 9.9  |  | 1           |
| 0.083333333 | 25.3    |  | 0.416666667 | 18.2 |  | 0.9151      | 20.1 |  | 1           |
| 0.083333333 | 1.7     |  | 0.416666667 | 16.2 |  | 0.9151      | 8.4  |  | 1           |
| 0.117808219 | 1.5     |  | 0.48        | 5.7  |  | 0.916666667 | 11.8 |  | 1           |
| 0.12        | 0.8     |  | 0.4959      | 20.9 |  | 0.916666667 | 6.5  |  | 1           |
| 0.166666667 | 17.4    |  | 0.4959      | 13.7 |  | 1           | 9.7  |  | 1           |
| 0.175342466 | 19.7    |  | 0.5         | 24.1 |  | 1           | 7.9  |  | 1           |
| 0.246575342 | 10.8    |  | 0.50        | 11.8 |  | 1           | 2.9  |  | 1.01        |
| 0.2466      | 27.7    |  | 0.550684932 | 19.7 |  | 1           | 16.6 |  | 1.019178082 |
| 0.2466      | 7.1     |  | 0.5808      | 11.0 |  | 1           | 12.7 |  | 1.030136986 |
| 0.2466      | 12.5    |  | 0.5808      | 13.9 |  | 1           | 13.3 |  | 1.03        |
| 0.25        | 24.0    |  | 0.583333333 | 17.2 |  | 1           | 10.6 |  | 1.04        |
| 0.320547945 | 28.5    |  | 0.666666667 | 16.3 |  | 1           | 22.6 |  | 1.08        |
|             |         |  | 0.68        | 12.5 |  | 1           | 4.4  |  | 1.101369863 |

|             |      |
|-------------|------|
| 1.197260274 | 1.0  |
| 1.32        | 6.1  |
| 1.51        | 4.7  |
| 1.539726027 | 14.0 |
| 1.684931507 | 21.6 |
| 1.704109589 | 12.2 |
| 1.74        | 7.4  |
| 1.775342466 | 9.4  |
| 1.83        | 5.4  |
| 2           | 8.4  |
| 2           | 18.9 |
| 2           | 14.7 |
| 2           | 5.3  |
| 2           | 0.7  |
| 2           | 18.8 |
| 2           | 1.4  |
| 2           | 9.6  |
| 2           | 12.3 |
| 2           | 10.2 |
| 2           | 9.3  |
| 2           | 8.1  |
| 2           | 5.9  |
| 2           | 7.7  |
| 2           | 10.2 |
| 2.035616438 | 10.5 |
| 2.043835616 | 9.0  |
| 2.232876712 | 16.6 |
| 2.449315068 | 13.0 |

|             |      |
|-------------|------|
| 2.60        | 0.5  |
| 2.663013699 | 15.7 |
| 2.663013699 | 18.8 |
| 2.67        | 7.9  |
| 2.690410959 | 7.4  |
| 2.690410959 | 15.4 |
| 2.72        | 7.6  |
| 3.0         | 6.4  |
| 3           | 5.4  |
| 3           | 5.6  |
| 3           | 12.5 |
| 3           | 0.5  |
| 3           | 8.4  |
| 3           | 4.7  |
| 3           | 5.5  |
| 3           | 4.4  |
| 3           | 6.9  |
| 3           | 7.2  |
| 3           | 17.7 |
| 3           | 7.7  |
| 3           | 10.1 |
| 3           | 9.0  |
| 3           | 4.0  |
| 3.07        | 5.8  |
| 3.13        | 19.2 |
| 3.309589041 | 12.3 |
| 3.33        | 8.6  |
| 3.676712329 | 14.1 |

|             |      |
|-------------|------|
| 3.82739726  | 16.3 |
| 3.89        | 3.3  |
| 4           | 10.8 |
| 4           | 8.3  |
| 4           | 16.9 |
| 4           | 5.1  |
| 4           | 8.9  |
| 4           | 7.3  |
| 4           | 10.9 |
| 4           | 7.2  |
| 4.02        | 6.2  |
| 4.25        | 0.7  |
| 4.309589041 | 7.2  |
| 5           | 9.6  |
| 5           | 6.6  |
| 5           | 8.5  |
| 5           | 13.5 |
| 5           | 3.2  |
| 5           | 11.3 |
| 5.265753425 | 11.3 |
| 5.55        | 6.4  |
| 5.99        | 5.1  |
| 6           | 6.9  |
| 6           | 10.4 |
| 6           | 5.5  |
| 6           | 9.8  |
| 6.16        | 7.7  |
| 6.40        | 6.0  |

|             |      |
|-------------|------|
| 6.805479452 | 11.8 |
| 7           | 12.4 |
| 7           | 1.5  |
| 7           | 9.0  |
| 7           | 8.4  |
| 7           | 9.9  |
| 7           | 8.7  |
| 7           | 6.4  |
| 7           | 9.3  |
| 7           | 4.7  |
| 7.101369863 | 3.9  |
| 7.70        | 6.2  |
| 8           | 7.8  |
| 8           | 10.2 |
| 8           | 15.1 |
| 8           | 7.1  |
| 8           | 5.7  |
| 8           | 6.4  |
| 8           | 13.9 |
| 8           | 5.3  |
| 8           | 9.4  |
| 8.024657534 | 7.0  |
| 8.03        | 11.1 |
| 8.10        | 7.9  |
| 8.11        | 2.9  |
| 8.523287671 | 5.6  |
| 9           | 5.5  |
| 9           | 9.5  |



|             |      |
|-------------|------|
| 9           | 13.1 |
| 9           | 10.3 |
| 9           | 8.4  |
| 9           | 6.7  |
| 9           | 8.5  |
| 9.512328767 | 7.9  |
| 10          | 12.1 |
| 10          | 7.0  |
| 10.96164384 | 9.0  |
| 11          | 7.5  |
| 11          | 8.6  |
| 11          | 10.9 |
| 11          | 8.2  |
| 11          | 5.3  |

|             |      |
|-------------|------|
| 11.44931507 | 10.2 |
| 11.96164384 | 6.5  |
| 12          | 13.5 |
| 12          | 10.1 |
| 13          | 9.7  |
| 13          | 3.7  |
| 13          | 6.0  |
| 13          | 6.7  |
| 13          | 5.7  |
| 13.05205479 | 5.7  |
| 14          | 9.2  |
| 14          | 12.0 |
| 14          | 7.9  |
| 14          | 9.0  |

|       |      |
|-------|------|
| 14    | 13.4 |
| 14    | 6.4  |
| 14    | 5.0  |
| 14    | 9.1  |
| 14.21 | 7.7  |
| 15    | 7.1  |
| 15    | 14.7 |
| 15    | 5.5  |
| 15    | 3.8  |
| 16    | 15.1 |
| 17    | 6.7  |
| 17    | 5.6  |
| 20    | 11.6 |
| 20    | 7.3  |

|    |      |
|----|------|
| 26 | 4.6  |
| 26 | 5.6  |
| 34 | 4.6  |
| 39 | 4.6  |
| 40 | 6.2  |
| 41 | 7.5  |
| 43 | 9.8  |
| 52 | 6.4  |
| 54 | 5.7  |
| 57 | 11.0 |
| 59 | 9.8  |
| 60 | 12.0 |
| 62 | 4.8  |

**Table S5:** Control values for dermatan sulfate (Di-4S) shown in ng/mL.

| Age         | Di-4S |             |      |
|-------------|-------|-------------|------|
| 0           | 18.6  | 0.3288      | 28.3 |
| 0           | 27.2  | 0.3288      | 15.4 |
| 0           | 25.7  | 0.3288      | 29.6 |
| 0.0027      | 12.4  | 0.333333333 | 30.0 |
| 0.0109      | 9.0   | 0.345205479 | 19.0 |
| 0.0109      | 36.5  | 0.353424658 | 24.2 |
| 0.0219      | 34.4  | 0.364383562 | 31.3 |
| 0.0739      | 26.9  | 0.36        | 21.5 |
| 0.082       | 28.5  | 0.40        | 16.6 |
| 0.08219     | 16.8  | 0.4137      | 1.6  |
| 0.08219     | 18.9  | 0.4137      | 30.6 |
| 0.08219     | 20.2  | 0.4137      | 30.3 |
| 0.083333333 | 25.2  | 0.4137      | 20.7 |
| 0.083333333 | 27.3  | 0.4137      | 26.5 |
| 0.117808219 | 22.3  | 0.4137      | 21.7 |
| 0.12        | 30.3  | 0.416666667 | 30.9 |
| 0.166666667 | 23.6  | 0.416666667 | 35.2 |
| 0.166666667 | 38.1  | 0.416666667 | 13.4 |
| 0.175342466 | 31.3  | 0.416666667 | 32.3 |
| 0.246575342 | 25.2  | 0.42        | 20.7 |
| 0.2466      | 25.2  | 0.48        | 26.5 |
| 0.2466      | 4.6   | 0.4959      | 9.5  |
| 0.2466      | 4.2   | 0.4959      | 16.7 |
| 0.25        | 19.6  | 0.5         | 19.3 |
| 0.320547945 | 29.2  | 0.50        | 23.4 |
|             |       | 0.550684932 | 19.4 |

|             |      |
|-------------|------|
| 0.56        | 21.8 |
| 0.5808      | 17.5 |
| 0.5808      | 30.2 |
| 0.583333333 | 11.6 |
| 0.666666667 | 24.7 |
| 0.68        | 11.6 |
| 0.70        | 15.1 |
| 0.726027397 | 27.4 |
| 0.7479      | 12.5 |
| 0.7479      | 27.8 |
| 0.7479      | 23.6 |
| 0.7479      | 21.5 |
| 0.75        | 19.4 |
| 0.761643836 | 19.4 |
| 0.8329      | 39.3 |
| 0.8329      | 18.5 |
| 0.8329      | 17.0 |
| 0.87        | 35.7 |
| 0.88        | 27.9 |
| 0.882191781 | 22.9 |
| 0.906849315 | 13.1 |
| 0.9151      | 12.1 |
| 0.916666667 | 21.0 |
| 0.916666667 | 6.8  |
| 1           | 6.0  |
| 1           | 19.7 |

|   |      |
|---|------|
| 1 | 14.1 |
| 1 | 23.3 |
| 1 | 22.5 |
| 1 | 19.8 |
| 1 | 25.3 |
| 1 | 23.0 |
| 1 | 27.9 |
| 1 | 30.6 |
| 1 | 24.0 |
| 1 | 30.8 |
| 1 | 5.4  |
| 1 | 32.8 |
| 1 | 20.4 |
| 1 | 17.6 |
| 1 | 28.5 |
| 1 | 25.2 |
| 1 | 26.3 |
| 1 | 22.8 |
| 1 | 33.4 |
| 1 | 22.0 |
| 1 | 18.5 |
| 1 | 19.9 |
| 1 | 20.4 |
| 1 | 40.1 |
| 1 | 16.3 |
| 1 | 18.7 |

|             |      |
|-------------|------|
| 1           | 19.2 |
| 1           | 22.9 |
| 1           | 5.4  |
| 1.01        | 19.1 |
| 1.019178082 | 14.1 |
| 1.030136986 | 21.8 |
| 1.03        | 21.6 |
| 1.04        | 8.9  |
| 1.08        | 16.3 |
| 1.101369863 | 21.3 |
| 1.197260274 | 24.0 |
| 1.32        | 20.5 |
| 1.51        | 22.7 |
| 1.539726027 | 20.6 |
| 1.684931507 | 23.3 |
| 1.704109589 | 20.8 |
| 1.74        | 12.2 |
| 1.775342466 | 21.6 |
| 1.83        | 19.0 |
| 1.860273973 | 9.1  |
| 2           | 8.3  |
| 2           | 15.6 |
| 2           | 15.1 |
| 2           | 25.4 |
| 2           | 21.0 |
| 2           | 26.2 |
| 2           | 18.6 |
| 2           | 13.8 |

|             |      |
|-------------|------|
| 2           | 35.5 |
| 2           | 23.4 |
| 2           | 3.4  |
| 2           | 17.8 |
| 2           | 5.8  |
| 2           | 23.1 |
| 2           | 11.2 |
| 2.035616438 | 20.4 |
| 2.043835616 | 28.0 |
| 2.232876712 | 34.3 |
| 2.449315068 | 11.1 |
| 2.60        | 17.6 |
| 2.663013699 | 15.5 |
| 2.663013699 | 33.6 |
| 2.67        | 17.5 |
| 2.690410959 | 12.9 |
| 2.690410959 | 24.0 |
| 2.72        | 12.3 |
| 3.0         | 16.2 |
| 3           | 32.9 |
| 3           | 7.8  |
| 3           | 1.5  |
| 3           | 13.0 |
| 3           | 0.8  |
| 3           | 15.4 |
| 3           | 1.1  |
| 3           | 29.2 |
| 3           | 25.0 |

|             |      |
|-------------|------|
| 3           | 14.6 |
| 3           | 14.0 |
| 3           | 24.1 |
| 3           | 17.9 |
| 3           | 16.9 |
| 3           | 27.0 |
| 3           | 24.6 |
| 3           | 18.1 |
| 3.07        | 30.7 |
| 3.13        | 13.5 |
| 3.309589041 | 18.3 |
| 3.33        | 32.9 |
| 3.676712329 | 15.9 |
| 3.82739726  | 29.5 |
| 3.89        | 23.0 |
| 4           | 23.9 |
| 4           | 20.4 |
| 4           | 19.6 |
| 4           | 25.1 |
| 4           | 20.6 |
| 4           | 33.0 |
| 4           | 27.9 |
| 4.02        | 18.7 |
| 4.25        | 20.1 |
| 4.309589041 | 20.2 |
| 5           | 29.3 |
| 5           | 2.7  |
| 5           | 14.9 |

|             |      |
|-------------|------|
| 5           | 29.3 |
| 5           | 16.9 |
| 5           | 27.5 |
| 5           | 23.5 |
| 5           | 29.4 |
| 5           | 13.1 |
| 5           | 19.1 |
| 5.265753425 | 19.9 |
| 5.55        | 24.3 |
| 5.99        | 22.3 |
| 6           | 24.8 |
| 6           | 24.1 |
| 6           | 22.8 |
| 6           | 18.5 |
| 6           | 19.8 |
| 6           | 19.7 |
| 6.16        | 22.2 |
| 6.40        | 22.2 |
| 6.805479452 | 12.7 |
| 7           | 12.0 |
| 7           | 19.6 |
| 7           | 2.2  |
| 7           | 11.6 |
| 7           | 17.8 |
| 7           | 19.7 |
| 7           | 19.9 |
| 7           | 16.2 |
| 7           | 19.6 |

|             |      |
|-------------|------|
| 7           | 11.1 |
| 7.101369863 | 14.3 |
| 7.70        | 31.1 |
| 8           | 22.0 |
| 8           | 26.1 |
| 8           | 29.2 |
| 8           | 16.5 |
| 8           | 16.3 |
| 8           | 29.9 |
| 8           | 24.3 |
| 8           | 25.7 |
| 8           | 18.0 |
| 8           | 4.6  |
| 8.024657534 | 21.7 |
| 8.03        | 20.1 |
| 8.10        | 15.3 |
| 8.11        | 29.9 |

|             |      |
|-------------|------|
| 8.523287671 | 33.1 |
| 9           | 16.1 |
| 9           | 31.3 |
| 9           | 22.1 |
| 9           | 16.9 |
| 9           | 17.0 |
| 9           | 15.8 |
| 9           | 14.0 |
| 9.512328767 | 21.0 |
| 10          | 20.6 |
| 10          | 19.2 |
| 10          | 25.0 |
| 10.96164384 | 22.9 |
| 11          | 1.4  |
| 11          | 21.2 |
| 11          | 27.6 |
| 11          | 20.8 |

|             |      |
|-------------|------|
| 11          | 16.6 |
| 11          | 24.8 |
| 11.44931507 | 21.6 |
| 11.96164384 | 12.6 |
| 12          | 2.2  |
| 12          | 18.5 |
| 13          | 19.1 |
| 13          | 22.0 |
| 13          | 20.9 |
| 13          | 18.8 |
| 13          | 17.2 |
| 13.05205479 | 20.1 |
| 14          | 4.2  |
| 14          | 18.9 |
| 14          | 20.8 |
| 14          | 18.2 |
| 14          | 21.2 |

|       |      |
|-------|------|
| 14    | 16.7 |
| 14.21 | 21.4 |
| 15    | 1.1  |
| 15    | 15.5 |
| 15    | 20.8 |
| 15    | 9.7  |
| 15    | 16.9 |
| 17    | 24.8 |
| 17    | 19.6 |
| 20    | 44.1 |
| 20    | 14.7 |
| 26    | 20.1 |
| 26    | 15.6 |
| 34    | 11.6 |
| 39    | 70.1 |
| 40    | 14.5 |
| 43    | 3.8  |

**Table S6:** Mono-sulfated keratan sulfate (KS) control values shown in ng/mL.

| Age | Mono-sulfated KS |
|-----|------------------|
| 0.0 | 643.3            |
| 0.0 | 553.1            |
| 0.0 | 549.5            |
| 0.0 | 384.9            |
| 0.0 | 497.9            |
| 0.0 | 912.1            |
| 0.0 | 760.5            |
| 0.0 | 1095.1           |
| 0.0 | 550.7            |
| 0.1 | 1015.0           |
| 0.1 | 1171.5           |
| 0.1 | 252.8            |
| 0.1 | 654.8            |
| 0.1 | 783.3            |
| 0.1 | 955.7            |
| 0.1 | 838.4            |
| 0.1 | 343.1            |
| 0.1 | 513.2            |
| 0.2 | 699.4            |
| 0.2 | 1071.1           |
| 0.2 | 1002.1           |
| 0.2 | 584.6            |
| 0.2 | 818.9            |
| 0.2 | 554.3            |
| 0.2 | 1193.0           |

|     |        |
|-----|--------|
| 0.2 | 945.8  |
| 0.2 | 1166.4 |
| 0.2 | 637.3  |
| 0.2 | 499.3  |
| 0.3 | 918.1  |
| 0.3 | 608.0  |
| 0.3 | 967.2  |
| 0.3 | 979.0  |
| 0.3 | 1075.8 |
| 0.3 | 519.4  |
| 0.3 | 524.2  |
| 0.4 | 570.5  |
| 0.4 | 1109.8 |
| 0.4 | 421.1  |
| 0.4 | 420.3  |
| 0.4 | 266.4  |
| 0.4 | 769.4  |
| 0.4 | 909.6  |
| 0.4 | 687.4  |
| 0.4 | 741.9  |
| 0.4 | 789.3  |
| 0.4 | 662.9  |
| 0.4 | 1165.2 |
| 0.4 | 762.0  |
| 0.4 | 674.3  |
| 0.4 | 725.2  |
| 0.5 | 544.0  |

|     |        |
|-----|--------|
| 0.5 | 1005.0 |
| 0.5 | 592.0  |
| 0.5 | 454.8  |
| 0.5 | 488.4  |
| 0.5 | 846.1  |
| 0.5 | 550.5  |
| 0.6 | 940.7  |
| 0.6 | 672.6  |
| 0.6 | 750.9  |
| 0.6 | 603.9  |
| 0.6 | 675.8  |
| 0.7 | 874.6  |
| 0.7 | 557.9  |
| 0.7 | 782.6  |
| 0.7 | 461.2  |
| 0.7 | 334.2  |
| 0.7 | 452.8  |
| 0.7 | 867.8  |
| 0.7 | 483.6  |
| 0.7 | 841.1  |
| 0.7 | 572.7  |
| 0.7 | 607.8  |
| 0.8 | 508.8  |
| 0.8 | 941.5  |
| 0.8 | 325.1  |
| 0.8 | 931.4  |
| 0.8 | 769.6  |

|     |        |
|-----|--------|
| 0.9 | 607.1  |
| 0.9 | 729.2  |
| 0.9 | 396.7  |
| 0.9 | 717.1  |
| 0.9 | 818.0  |
| 0.9 | 551.6  |
| 0.9 | 942.1  |
| 0.9 | 630.8  |
| 0.9 | 324.0  |
| 1.0 | 319.1  |
| 1.0 | 476.4  |
| 1.0 | 871.1  |
| 1.0 | 1190.9 |
| 1.0 | 830.3  |
| 1.0 | 798.1  |
| 1.0 | 1071.7 |
| 1.0 | 1095.1 |
| 1.0 | 605.9  |
| 1.0 | 663.1  |
| 1.0 | 389.7  |
| 1.0 | 451.9  |
| 1.0 | 1031.7 |
| 1.0 | 854.8  |
| 1.0 | 749.8  |
| 1.0 | 1150.2 |
| 1.0 | 1061.3 |
| 1.0 | 714.2  |

|      |        |
|------|--------|
| 1.0  | 489.4  |
| 1.0  | 724.8  |
| 1.0  | 825.2  |
| 1.0  | 1124.3 |
| 1.0  | 992.4  |
| 1.0  | 632.0  |
| 1.0  | 840.2  |
| 1.0  | 988.8  |
| 1.0  | 934.9  |
| 1.0  | 954.4  |
| 1.0  | 828.3  |
| 1.0  | 581.3  |
| 1.0  | 576.9  |
| 1.0  | 732.8  |
| 1.0  | 784.4  |
| 1.0  | 786.2  |
| 1.0  | 749.8  |
| 1.01 | 697.4  |
| 1.02 | 495.0  |
| 1.03 | 393.6  |
| 1.03 | 386.1  |
| 1.04 | 967.9  |
| 1.08 | 558.9  |
| 1.10 | 597.0  |
| 1.20 | 723.3  |
| 1.30 | 768.0  |
| 1.32 | 407.7  |
| 1.51 | 634.5  |

|      |        |
|------|--------|
| 1.54 | 878.5  |
| 1.68 | 617.5  |
| 1.70 | 857.6  |
| 1.74 | 515.9  |
| 1.78 | 892.4  |
| 1.83 | 845.6  |
| 2.00 | 929.7  |
| 2.00 | 917.4  |
| 2.00 | 659.1  |
| 2.00 | 509.1  |
| 2.00 | 861.9  |
| 2.00 | 768.2  |
| 2.00 | 448.7  |
| 2.00 | 1111.5 |
| 2.00 | 821.5  |
| 2.00 | 1153.1 |
| 2.00 | 579.6  |
| 2.00 | 670.4  |
| 2.00 | 746.9  |
| 2.00 | 871.2  |
| 2.00 | 1044.2 |
| 2.04 | 1060.2 |
| 2.23 | 1156.4 |
| 2.45 | 424.3  |
| 2.56 | 850.3  |
| 2.60 | 612.3  |
| 2.66 | 876.1  |
| 2.66 | 736.3  |

|      |        |
|------|--------|
| 2.67 | 719.1  |
| 2.69 | 375.4  |
| 2.69 | 917.2  |
| 2.98 | 1198.7 |
| 3.00 | 419.8  |
| 3.00 | 515.8  |
| 3.00 | 626.5  |
| 3.00 | 660.4  |
| 3.00 | 659.4  |
| 3.00 | 853.1  |
| 3.00 | 364.2  |
| 3.00 | 764.7  |
| 3.00 | 689.4  |
| 3.00 | 435.2  |
| 3.00 | 641.8  |
| 3.00 | 763.3  |
| 3.00 | 757.2  |
| 3.00 | 575.7  |
| 3.00 | 293.5  |
| 3.00 | 811.6  |
| 3.00 | 896.9  |
| 3.00 | 932.5  |
| 3.00 | 901.6  |
| 3.00 | 787.9  |
| 3.13 | 604.0  |
| 3.31 | 817.8  |
| 3.33 | 612.3  |
| 3.68 | 1042.3 |

|      |        |
|------|--------|
| 3.83 | 754.1  |
| 3.89 | 687.9  |
| 4.00 | 1032.6 |
| 4.00 | 697.1  |
| 4.00 | 622.4  |
| 4.00 | 582.7  |
| 4.00 | 399.5  |
| 4.00 | 1054.5 |
| 4.00 | 611.1  |
| 4.02 | 775.3  |
| 4.25 | 546.9  |
| 4.31 | 660.0  |
| 5.00 | 923.8  |
| 5.00 | 676.8  |
| 5.00 | 1067.8 |
| 5.00 | 686.4  |
| 5.00 | 586.0  |
| 5.00 | 635.4  |
| 5.00 | 656.8  |
| 5.00 | 764.2  |
| 5.00 | 1025.4 |
| 5.3  | 659.6  |
| 5.6  | 324.6  |
| 6.0  | 907.8  |
| 6.0  | 639.1  |
| 6.0  | 643.4  |
| 6.0  | 710.5  |
| 6.0  | 719.1  |

|     |       |
|-----|-------|
| 6.0 | 705.4 |
| 6.0 | 910.3 |
| 6.2 | 518.8 |
| 6.4 | 652.8 |
| 6.8 | 757.7 |
| 7.0 | 456.1 |
| 7.0 | 973.1 |
| 7.0 | 527.8 |
| 7.0 | 769.7 |
| 7.0 | 925.8 |
| 7.0 | 981.5 |
| 7.0 | 833.7 |
| 7.0 | 711.8 |
| 7.0 | 966.6 |
| 7.0 | 591.5 |
| 7.1 | 666.0 |
| 7.7 | 589.4 |
| 8.0 | 905.0 |
| 8.0 | 648.5 |
| 8.0 | 283.6 |
| 8.0 | 859.7 |
| 8.0 | 752.9 |
| 8.0 | 590.0 |
| 8.0 | 422.8 |

|      |        |
|------|--------|
| 8.0  | 857.1  |
| 8.0  | 832.6  |
| 8.0  | 744.3  |
| 8.0  | 676.3  |
| 8.0  | 1008.7 |
| 8.0  | 840.7  |
| 8.1  | 669.4  |
| 8.1  | 607.4  |
| 8.5  | 696.5  |
| 9.0  | 728.7  |
| 9.0  | 491.6  |
| 9.0  | 354.1  |
| 9.0  | 452.2  |
| 9.0  | 1043.9 |
| 9.0  | 692.7  |
| 9.0  | 712.7  |
| 9.0  | 670.9  |
| 9.5  | 484.7  |
| 10.0 | 663.6  |
| 11.0 | 484.7  |
| 11.0 | 561.3  |
| 11.0 | 359.6  |
| 11.0 | 840.2  |
| 11.0 | 470.1  |

|      |       |
|------|-------|
| 11.4 | 722.6 |
| 12.0 | 807.6 |
| 12.0 | 504.1 |
| 12.0 | 340.8 |
| 12.0 | 217.8 |
| 12.0 | 832.1 |
| 12.0 | 457.7 |
| 13.0 | 806.5 |
| 13.0 | 437.6 |
| 13.0 | 562.0 |
| 13.0 | 594.9 |
| 13.0 | 722.0 |
| 13.0 | 777.4 |
| 13.1 | 687.7 |
| 14.0 | 422.8 |
| 14.0 | 350.5 |
| 14.0 | 655.7 |
| 14.0 | 640.8 |
| 14.0 | 296.4 |
| 14.0 | 449.8 |
| 14.0 | 376.8 |
| 14.0 | 388.2 |
| 14.0 | 525.3 |
| 14.0 | 589.0 |

|      |       |
|------|-------|
| 14.0 | 392.3 |
| 14.2 | 526.3 |
| 15.0 | 307.5 |
| 15.0 | 296.7 |
| 15.0 | 329.2 |
| 15.0 | 374.3 |
| 15.0 | 316.4 |
| 16.0 | 469.0 |
| 17.0 | 148.6 |
| 17.0 | 396.5 |
| 20.0 | 266.4 |
| 26   | 196.1 |
| 26   | 204.6 |
| 34   | 424.1 |
| 39   | 368.6 |
| 40   | 226.5 |
| 41   | 204.5 |
| 43   | 369.7 |
| 52   | 182.8 |
| 54   | 334.3 |
| 59   | 286.9 |
| 60   | 280.7 |
| 62   | 305.2 |





|     |       |
|-----|-------|
| 1.0 | 62.0  |
| 1.0 | 84.9  |
| 1.1 | 199.7 |
| 1.1 | 112.4 |
| 1.2 | 129.8 |
| 1.3 | 285.1 |
| 1.3 | 68.7  |
| 1.5 | 102.8 |
| 1.5 | 134.0 |
| 1.7 | 100.9 |
| 1.7 | 139.0 |
| 1.7 | 198.6 |
| 1.8 | 133.3 |
| 1.8 | 151.6 |
| 1.9 | 183.1 |
| 2.0 | 162.7 |
| 2.0 | 174.3 |
| 2.0 | 257.3 |
| 2.0 | 73.7  |
| 2.0 | 172.0 |
| 2.0 | 225.9 |
| 2.0 | 120.0 |
| 2.0 | 124.7 |
| 2.0 | 81.8  |
| 2.0 | 156.4 |
| 2.0 | 130.4 |
| 2.0 | 143.8 |

|     |       |
|-----|-------|
| 2.0 | 128.0 |
| 2.0 | 133.6 |
| 2.0 | 178.1 |
| 2.2 | 174.9 |
| 2.4 | 149.8 |
| 2.6 | 263.2 |
| 2.6 | 113.1 |
| 2.7 | 229.8 |
| 2.7 | 134.6 |
| 2.7 | 87.5  |
| 2.7 | 201.5 |
| 2.7 | 195.3 |
| 3.0 | 184.2 |
| 3.0 | 88.5  |
| 3.0 | 104.6 |
| 3.0 | 104.0 |
| 3.0 | 118.0 |
| 3.0 | 75.5  |
| 3.0 | 285.0 |
| 3.0 | 175.3 |
| 3.0 | 199.9 |
| 3.0 | 288.0 |
| 3.0 | 245.0 |
| 3.0 | 133.3 |
| 3.0 | 137.1 |
| 3.0 | 134.4 |
| 3.0 | 121.4 |

|     |       |
|-----|-------|
| 3.1 | 220.9 |
| 3.1 | 126.2 |
| 3.3 | 123.8 |
| 3.3 | 118.6 |
| 3.7 | 188.1 |
| 3.8 | 237.5 |
| 3.9 | 238.7 |
| 4.0 | 210.6 |
| 4.0 | 119.2 |
| 4.0 | 278.5 |
| 4.0 | 148.8 |
| 4.0 | 99.3  |
| 4.0 | 160.7 |
| 4.0 | 138.6 |
| 4.0 | 149.4 |
| 4.3 | 120.9 |
| 4.3 | 274.3 |
| 5.0 | 194.9 |
| 5.0 | 111.7 |
| 5.0 | 253.0 |
| 5.0 | 241.9 |
| 5.0 | 184.9 |
| 5.0 | 111.0 |
| 5.0 | 176.8 |
| 5.3 | 105.4 |
| 5.6 | 61.9  |
| 6.0 | 213.3 |

|     |       |
|-----|-------|
| 6.0 | 226.6 |
| 6.0 | 330.2 |
| 6.0 | 160.7 |
| 6.0 | 140.7 |
| 6.0 | 304.7 |
| 6.2 | 112.8 |
| 6.4 | 125.1 |
| 6.8 | 171.9 |
| 7.0 | 115.9 |
| 7.0 | 213.4 |
| 7.0 | 73.1  |
| 7.0 | 160.5 |
| 7.0 | 166.8 |
| 7.0 | 116.1 |
| 7.0 | 139.6 |
| 7.1 | 157.0 |
| 7.7 | 128.4 |
| 8.0 | 162.7 |
| 8.0 | 250.6 |
| 8.0 | 147.1 |
| 8.0 | 159.5 |
| 8.0 | 162.5 |
| 8.0 | 148.1 |
| 8.0 | 153.1 |
| 8.0 | 132.5 |
| 8.0 | 146.2 |
| 8.0 | 152.4 |

|      |       |
|------|-------|
| 8.0  | 175.6 |
| 8.0  | 292.6 |
| 8.1  | 121.4 |
| 8.1  | 271.9 |
| 8.5  | 160.2 |
| 9.0  | 162.6 |
| 9.0  | 154.9 |
| 9.0  | 201.2 |
| 9.0  | 161.4 |
| 9.0  | 147.8 |
| 9.0  | 175.2 |
| 9.0  | 110.6 |
| 9.5  | 214.6 |
| 10.0 | 243.5 |
| 11.0 | 4.8   |
| 11.0 | 273.6 |
| 11.0 | 194.2 |

|      |       |
|------|-------|
| 11.0 | 116.0 |
| 11.0 | 95.4  |
| 12.0 | 145.1 |
| 12.0 | 101.5 |
| 12.0 | 228.0 |
| 12.0 | 152.4 |
| 12.0 | 204.2 |
| 12.0 | 192.6 |
| 13.0 | 190.7 |
| 13.0 | 278.4 |
| 13.0 | 69.6  |
| 13.0 | 92.3  |
| 13.0 | 122.3 |
| 13.0 | 266.1 |
| 13.1 | 124.8 |
| 14.0 | 232.4 |
| 14.0 | 101.2 |

|      |       |
|------|-------|
| 14.0 | 146.7 |
| 14.0 | 122.7 |
| 14.0 | 96.4  |
| 14.0 | 282.9 |
| 14.0 | 90.8  |
| 14.0 | 115.1 |
| 14.0 | 78.4  |
| 14.0 | 100.9 |
| 14.0 | 67.8  |
| 14.2 | 181.8 |
| 15.0 | 81.0  |
| 15.0 | 74.5  |
| 15.0 | 255.6 |
| 15.0 | 69.0  |
| 15.0 | 51.7  |
| 16.0 | 118.9 |
| 17.0 | 70.5  |

|      |       |
|------|-------|
| 17.0 | 71.4  |
| 20.0 | 131.4 |
| 20.0 | 206.7 |
| 26   | 43.3  |
| 26   | 32.6  |
| 34   | 86.8  |
| 39   | 53.8  |
| 40   | 33.4  |
| 41   | 64.9  |
| 43   | 111.7 |
| 52   | 77.1  |
| 54   | 86.8  |
| 57   | 93.3  |
| 59   | 106.9 |
| 60   | 62.5  |
| 62   | 102.2 |

**Table S8:** Control values for the ratio of di-sulfated keratan sulfate (KS) to total keratan sulfate.

| Age | Di-sulfated<br>KS/Total<br>KS |     |       |  |     |       |  |      |       |
|-----|-------------------------------|-----|-------|--|-----|-------|--|------|-------|
|     |                               | 0.3 | 9.28  |  | 0.7 | 23.89 |  | 1.0  | 13.14 |
|     |                               | 0.3 | 12.78 |  | 0.7 | 11.16 |  | 1.0  | 13.43 |
| 0.0 | 14.18                         | 0.3 | 26.57 |  | 0.7 | 19.08 |  | 1.0  | 22.41 |
| 0.0 | 12.91                         | 0.3 | 15.26 |  | 0.7 | 12.73 |  | 1.0  | 23.34 |
| 0.0 | 9.72                          | 0.4 | 12.14 |  | 0.7 | 24.24 |  | 1.0  | 21.77 |
| 0.0 | 13.81                         | 0.4 | 14.88 |  | 0.7 | 16.37 |  | 1.0  | 18.86 |
| 0.0 | 13.94                         | 0.4 | 5.01  |  | 0.7 | 18.65 |  | 1.0  | 10.04 |
| 0.0 | 11.06                         | 0.4 | 20.51 |  | 0.7 | 16.24 |  | 1.0  | 14.32 |
| 0.0 | 19.22                         | 0.4 | 5.35  |  | 0.7 | 15.45 |  | 1.0  | 9.20  |
| 0.0 | 13.93                         | 0.4 | 21.94 |  | 0.8 | 22.14 |  | 1.0  | 11.70 |
| 0.1 | 21.70                         | 0.4 | 17.78 |  | 0.8 | 21.62 |  | 1.0  | 14.20 |
| 0.1 | 10.15                         | 0.4 | 9.80  |  | 0.8 | 11.29 |  | 1.0  | 9.84  |
| 0.1 | 11.66                         | 0.4 | 10.90 |  | 0.8 | 15.22 |  | 1.0  | 11.53 |
| 0.1 | 13.03                         | 0.4 | 13.36 |  | 0.9 | 13.40 |  | 1.0  | 12.23 |
| 0.1 | 14.55                         | 0.4 | 17.29 |  | 0.9 | 19.66 |  | 1.0  | 26.57 |
| 0.1 | 10.43                         | 0.4 | 14.80 |  | 0.9 | 13.73 |  | 1.0  | 14.86 |
| 0.1 | 19.03                         | 0.5 | 13.83 |  | 0.9 | 18.03 |  | 1.0  | 12.07 |
| 0.1 | 13.54                         | 0.5 | 19.14 |  | 0.9 | 13.81 |  | 1.0  | 12.97 |
| 0.2 | 24.97                         | 0.5 | 13.75 |  | 0.9 | 11.66 |  | 1.0  | 14.45 |
| 0.2 | 13.42                         | 0.5 | 16.88 |  | 0.9 | 18.47 |  | 1.0  | 21.77 |
| 0.2 | 13.66                         | 0.5 | 26.58 |  | 1.0 | 14.63 |  | 1.01 | 19.58 |
| 0.2 | 22.73                         | 0.6 | 14.64 |  | 1.0 | 26.60 |  | 1.03 | 17.81 |
| 0.2 | 5.99                          | 0.6 | 13.80 |  | 1.0 | 13.71 |  | 1.03 | 13.84 |
| 0.2 | 16.85                         | 0.6 | 24.40 |  | 1.0 | 13.74 |  | 1.04 | 8.06  |
| 0.2 | 14.82                         | 0.6 | 20.18 |  | 1.0 | 13.13 |  | 1.08 | 26.33 |
| 0.3 | 14.34                         | 0.6 | 14.08 |  | 1.0 | 13.11 |  | 1.10 | 15.84 |
| 0.3 | 16.80                         | 0.7 | 21.49 |  | 1.0 | 10.20 |  | 1.20 | 15.22 |

|      |       |
|------|-------|
| 1.30 | 27.07 |
| 1.32 | 14.42 |
| 1.51 | 13.94 |
| 1.54 | 13.24 |
| 1.68 | 14.05 |
| 1.70 | 13.95 |
| 1.78 | 12.99 |
| 1.83 | 15.20 |
| 1.86 | 12.96 |
| 2.00 | 14.90 |
| 2.00 | 12.67 |
| 2.00 | 21.90 |
| 2.00 | 10.06 |
| 2.00 | 25.26 |
| 2.00 | 20.77 |
| 2.00 | 13.51 |
| 2.00 | 21.75 |
| 2.00 | 9.06  |
| 2.00 | 11.95 |
| 2.00 | 18.37 |
| 2.00 | 17.66 |
| 2.00 | 14.63 |
| 2.00 | 13.30 |
| 2.00 | 14.57 |
| 2.23 | 13.14 |
| 2.45 | 26.09 |
| 2.56 | 23.64 |
| 2.60 | 15.59 |

|      |       |
|------|-------|
| 2.66 | 23.78 |
| 2.67 | 15.77 |
| 2.69 | 18.90 |
| 2.69 | 18.01 |
| 2.72 | 13.70 |
| 3.0  | 13.32 |
| 3.00 | 17.42 |
| 3.00 | 16.86 |
| 3.00 | 14.24 |
| 3.00 | 15.16 |
| 3.00 | 10.27 |
| 3.00 | 25.04 |
| 3.00 | 20.72 |
| 3.00 | 29.47 |
| 3.00 | 12.94 |
| 3.00 | 12.82 |
| 3.00 | 12.97 |
| 3.00 | 13.36 |
| 3.07 | 16.12 |
| 3.13 | 17.28 |
| 3.31 | 13.14 |
| 3.33 | 16.23 |
| 3.68 | 15.29 |
| 3.83 | 23.95 |
| 3.89 | 25.76 |
| 4.00 | 16.94 |
| 4.00 | 14.60 |
| 4.00 | 20.34 |

|      |       |
|------|-------|
| 4.00 | 19.91 |
| 4.00 | 13.22 |
| 4.00 | 18.49 |
| 4.02 | 16.16 |
| 4.25 | 18.10 |
| 4.31 | 29.36 |
| 5.00 | 17.42 |
| 5.00 | 14.16 |
| 5.00 | 26.93 |
| 5.00 | 29.22 |
| 5.00 | 22.54 |
| 5.00 | 12.69 |
| 5.00 | 14.71 |
| 5.3  | 13.78 |
| 5.6  | 16.02 |
| 6.0  | 19.02 |
| 6.0  | 26.17 |
| 6.0  | 18.44 |
| 6.0  | 16.37 |
| 6.0  | 25.08 |
| 6.2  | 17.86 |
| 6.4  | 16.08 |
| 6.8  | 18.49 |
| 7.0  | 20.26 |
| 7.0  | 17.99 |
| 7.0  | 12.16 |
| 7.0  | 14.05 |
| 7.0  | 16.67 |

|      |       |
|------|-------|
| 7.0  | 14.02 |
| 7.0  | 19.09 |
| 7.1  | 19.08 |
| 7.7  | 17.88 |
| 8.0  | 15.23 |
| 8.0  | 27.87 |
| 8.0  | 17.48 |
| 8.0  | 21.60 |
| 8.0  | 25.94 |
| 8.0  | 15.16 |
| 8.0  | 13.73 |
| 8.0  | 16.42 |
| 8.0  | 18.39 |
| 8.0  | 14.83 |
| 8.0  | 25.82 |
| 8.1  | 15.35 |
| 8.1  | 30.92 |
| 8.5  | 18.70 |
| 9.0  | 18.25 |
| 9.0  | 23.96 |
| 9.0  | 26.31 |
| 9.0  | 17.58 |
| 9.0  | 19.74 |
| 9.0  | 14.16 |
| 9.5  | 30.68 |
| 10.0 | 26.85 |
| 11.0 | 0.99  |
| 11.0 | 32.77 |

|      |       |
|------|-------|
| 11.0 | 35.07 |
| 11.0 | 12.13 |
| 11.0 | 16.87 |
| 12.0 | 15.23 |
| 12.0 | 16.76 |
| 12.0 | 19.71 |
| 13.0 | 19.12 |
| 13.0 | 38.88 |
| 13.0 | 11.02 |
| 13.0 | 13.43 |
| 13.0 | 14.48 |
| 13.0 | 25.50 |

|      |       |
|------|-------|
| 13.1 | 15.36 |
| 14.0 | 35.47 |
| 14.0 | 22.40 |
| 14.0 | 18.28 |
| 14.0 | 16.07 |
| 14.0 | 24.54 |
| 14.0 | 38.61 |
| 14.0 | 19.42 |
| 14.0 | 22.88 |
| 14.0 | 12.98 |
| 14.0 | 14.63 |
| 14.0 | 14.73 |

|      |       |
|------|-------|
| 14.2 | 25.67 |
| 15.0 | 20.85 |
| 15.0 | 20.07 |
| 15.0 | 15.56 |
| 15.0 | 14.05 |
| 16.0 | 20.22 |
| 17.0 | 32.16 |
| 17.0 | 15.26 |
| 20.0 | 19.37 |
| 26   | 18.10 |
| 26   | 13.74 |
| 34   | 17.00 |

|    |       |
|----|-------|
| 39 | 12.74 |
| 40 | 12.84 |
| 41 | 24.09 |
| 43 | 23.19 |
| 52 | 29.67 |
| 54 | 20.62 |
| 57 | 15.39 |
| 59 | 27.15 |
| 60 | 18.20 |
| 62 | 25.10 |
